# Supplementary material for: Expanding the Diversity of Myoviridae Phages Infecting Lactobacillus Plantarum - A Novel Lineage of Lactobacillus Phages Comprising Five New Members
Source: Preprints.org preprint supplement (doi:10.20944/preprints201812.0026.v1), 2018-12-03
Supplement: Supplementary file 1 [file Spreadsheet S1.xlsx]

## Sheet: Sheet1
	fig|6666666.374196.peg.101	fig|6666666.374196.peg.1	fig|6666666.374196.peg.2	fig|6666666.374196.peg.3	fig|6666666.374196.peg.4	fig|6666666.374196.peg.5	fig|6666666.374196.peg.6	fig|6666666.374196.peg.7	fig|6666666.374196.peg.8	fig|6666666.374196.peg.9	fig|6666666.374196.peg.10	fig|6666666.374196.peg.11	fig|6666666.374196.peg.12	fig|6666666.374196.peg.13	fig|6666666.374196.peg.14	fig|6666666.374196.peg.15	fig|6666666.374196.peg.16	fig|6666666.374196.peg.17	fig|6666666.374196.peg.18	fig|6666666.374196.peg.19	fig|6666666.374196.peg.20	fig|6666666.374196.peg.21	fig|6666666.374196.peg.22	fig|6666666.374196.peg.23	fig|6666666.374196.peg.24	fig|6666666.374196.peg.25	fig|6666666.374196.peg.26	fig|6666666.374196.peg.27	fig|6666666.374196.peg.28	fig|6666666.374196.peg.29	fig|6666666.374196.peg.30	fig|6666666.374196.peg.31	fig|6666666.374196.peg.32	fig|6666666.374196.peg.33	fig|6666666.374196.peg.34	fig|6666666.374196.peg.35	fig|6666666.374196.peg.36	fig|6666666.374196.peg.37	fig|6666666.374196.peg.38	fig|6666666.374196.peg.39	fig|6666666.374196.peg.40	fig|6666666.374196.peg.41	fig|6666666.374196.peg.42	fig|6666666.374196.peg.43	fig|6666666.374196.peg.44	fig|6666666.374196.peg.45	fig|6666666.374196.peg.46	fig|6666666.374196.peg.47	fig|6666666.374196.peg.48
fig|6666666.374196.peg.101		5	6	6	6	3	5	4	2	5	7	5	6	4	4	5	4	2	4	5	5	4	2	3	4	3	2	5	4	6	5	6	3	5	3	3	4	5	9	4	4	6	6	3	5	6	6	5	4
fig|6666666.374196.peg.1	5		5	5	4	2	4	3	3	5	5	4	5	6	7	5	5	3	5	4	6	5	3	3	5	2	5	4	9	5	6	4	2	7	2	6	5	6	4	8	6	4	5	3	6	9	6	4	3
fig|6666666.374196.peg.2	6	5		8	5	3	3	4	3	2	4	5	2	4	4	5	4	3	1	9	4	5	1	2	3	2	9	7	5	7	6	2	1	5	1	6	3	7	2	6	4	2	4	1	3	7	4	4	4
fig|6666666.374196.peg.3	6	5	8		3	4	4	7	7	3	6	5	4	6	5	7	4	3	3	7	6	10	1	2	4	2	6	5	6	6	8	3	2	6	2	3	2	8	3	7	4	3	6	6	3	9	5	6	10
fig|6666666.374196.peg.4	6	4	5	3		4	5	4	2	4	6	6	5	6	6	5	6	3	4	5	4	3	2	3	5	2	3	4	5	4	4	4	3	5	2	2	5	4	5	4	8	4	5	2	4	4	8	6	3
fig|6666666.374196.peg.5	3	2	3	4	4		3	5	7	1	2	4	1	5	3	7	4	3	2	5	4	4	1	1	3	1	7	5	4	4	4	3	1	3	1	9	2	5	3	4	5	3	3	7	1	5	3	6	8
fig|6666666.374196.peg.6	5	4	3	4	5	3		4	2	5	4	6	3	6	3	5	6	2	4	3	6	4	2	2	30	2	2	3	2	4	6	3	4	3	2	3	4	5	5	8	5	3	7	5	4	4	5	6	3
fig|6666666.374196.peg.7	4	3	4	7	4	5	4		2	2	6	4	2	3	3	4	3	4	1	3	7	6	1	1	2	1	3	6	4	6	4	2	1	7	1	5	3	3	4	4	2	2	4	7	3	3	3	4	7
fig|6666666.374196.peg.8	2	3	3	7	2	7	2	2		1	1	3	1	3	2	1	1	5	1	6	3	3	0	1	1	1	5	5	3	4	1	2	0	4	1	5	0	6	3	4	3	2	2	5	2	3	1	1	4
fig|6666666.374196.peg.9	5	5	2	3	4	1	5	2	1		5	4	6	4	4	2	4	2	6	3	4	3	3	4	3	4	2	3	4	3	5	6	4	3	3	2	7	3	4	5	4	4	3	1	6	5	7	4	2
fig|6666666.374196.peg.10	7	5	4	6	6	2	4	6	1	5		7	4	8	7	5	5	2	3	4	7	6	2	2	4	2	3	5	5	6	6	4	2	8	2	4	4	6	6	4	6	4	7	3	4	7	4	4	2
fig|6666666.374196.peg.11	5	4	5	5	6	4	6	4	3	4	7		6	6	5	4	4	2	4	5	5	3	1	3	5	3	2	6	5	5	4	5	3	4	2	3	5	4	5	6	5	6	7	4	5	5	5	4	3
fig|6666666.374196.peg.12	6	5	2	4	5	1	3	2	1	6	4	6		5	5	5	5	2	6	3	4	3	3	4	4	4	3	2	4	3	5	5	4	3	3	4	5	4	6	5	6	6	6	2	5	3	7	5	2
fig|6666666.374196.peg.13	4	6	4	6	6	5	6	3	3	4	8	6	5		5	4	6	4	5	5	5	3	3	3	5	3	2	4	5	4	7	5	2	4	1	4	5	3	5	5	6	4	5	2	4	6	6	6	4
fig|6666666.374196.peg.14	4	7	4	5	6	3	3	3	2	4	7	5	5	5		6	6	1	3	4	6	6	2	2	7	2	5	4	6	6	3	6	3	6	2	5	4	6	4	6	8	6	5	2	5	5	6	5	4
fig|6666666.374196.peg.15	5	5	5	7	5	7	5	4	1	2	5	4	5	4	6		7	3	4	8	7	4	2	3	6	2	6	5	7	6	7	4	2	6	2	5	5	9	6	8	7	5	5	3	4	7	5	7	4
fig|6666666.374196.peg.16	4	5	4	4	6	4	6	3	1	4	5	4	5	6	6	7		3	5	5	5	4	2	3	5	3	5	7	8	6	8	3	3	5	2	4	5	5	4	6	7	5	6	2	5	5	7	5	3
fig|6666666.374196.peg.17	2	3	3	3	3	3	2	4	5	2	2	2	2	4	1	3	3		1	4	4	4	1	1	2	1	4	6	3	5	2	2	1	5	0	7	2	4	3	5	3	1	3	5	2	4	3	4	5
fig|6666666.374196.peg.18	4	5	1	3	4	2	4	1	1	6	3	4	6	5	3	4	5	1		2	3	3	5	7	3	5	2	2	3	4	3	5	7	2	4	2	6	3	5	5	5	8	6	1	4	4	6	4	1
fig|6666666.374196.peg.19	5	4	9	7	5	5	3	3	6	3	4	5	3	5	4	8	5	4	2		5	6	1	2	4	1	6	11	8	8	8	4	1	4	1	5	4	4	5	4	5	3	3	5	2	6	2	5	8
fig|6666666.374196.peg.20	5	6	4	6	4	4	6	7	3	4	7	5	4	5	6	7	5	4	3	5		7	2	1	6	1	4	8	8	6	8	4	2	5	1	7	3	7	4	7	5	2	5	4	3	5	6	7	5
fig|6666666.374196.peg.21	4	5	5	10	3	4	4	6	3	3	6	3	3	3	6	4	4	4	3	6	7		1	1	3	1	5	7	4	5	7	3	1	6	1	5	4	5	3	4	5	2	4	5	3	6	4	5	6
fig|6666666.374196.peg.22	2	3	1	1	2	1	2	1	0	3	2	1	3	3	2	2	2	1	5	1	2	1		9	2	9	1	1	2	1	2	3	6	2	10	1	3	1	2	1	2	4	2	1	4	2	2	2	1
fig|6666666.374196.peg.23	3	3	2	2	3	1	2	1	1	4	2	3	4	3	2	3	3	1	7	2	1	1	9		2	8	1	1	2	2	2	4	6	2	8	2	4	2	3	2	2	5	3	1	4	1	3	2	2
fig|6666666.374196.peg.24	4	5	3	4	5	3	30	2	1	3	4	5	4	5	7	6	5	2	3	4	6	3	2	2		3	2	3	3	4	4	5	3	5	1	2	3	5	5	6	5	3	6	4	4	6	5	4	2
fig|6666666.374196.peg.25	3	2	2	2	2	1	2	1	1	4	2	3	4	3	2	2	3	1	5	1	1	1	9	8	3		2	1	2	1	2	4	7	2	10	2	3	1	2	2	2	4	2	1	4	2	4	2	1
fig|6666666.374196.peg.26	2	5	9	6	3	7	2	3	5	2	3	2	3	2	5	6	5	4	2	6	4	5	1	1	2	2		5	6	4	7	3	2	6	1	13	3	7	3	4	3	3	3	1	2	4	4	1	6
fig|6666666.374196.peg.27	5	4	7	5	4	5	3	6	5	3	5	6	2	4	4	5	7	6	2	11	8	7	1	1	3	1	5		5	9	6	3	1	8	1	6	4	7	4	5	5	3	2	5	2	5	3	6	7
fig|6666666.374196.peg.28	4	9	5	6	5	4	2	4	3	4	5	5	4	5	6	7	8	3	3	8	8	4	2	2	3	2	6	5		9	5	5	2	4	2	5	5	4	3	5	7	4	4	3	5	7	7	4	3
fig|6666666.374196.peg.29	6	5	7	6	4	4	4	6	4	3	6	5	3	4	6	6	6	5	4	8	6	5	1	2	4	1	4	9	9		7	4	1	7	1	8	4	6	4	7	5	3	4	10	3	7	6	9	4
fig|6666666.374196.peg.30	5	6	6	8	4	4	6	4	1	5	6	4	5	7	3	7	8	2	3	8	8	7	2	2	4	2	7	6	5	7		4	3	6	2	7	3	8	3	4	5	5	4	3	3	4	4	6	5
fig|6666666.374196.peg.31	6	4	2	3	4	3	3	2	2	6	4	5	5	5	6	4	3	2	5	4	4	3	3	4	5	4	3	3	5	4	4		4	4	3	4	7	5	4	4	7	4	6	2	4	5	6	5	3
fig|6666666.374196.peg.32	3	2	1	2	3	1	4	1	0	4	2	3	4	2	3	2	3	1	7	1	2	1	6	6	3	7	2	1	2	1	3	4		2	7	2	4	2	4	3	2	6	4	1	4	2	3	2	1
fig|6666666.374196.peg.33	5	7	5	6	5	3	3	7	4	3	8	4	3	4	6	6	5	5	2	4	5	6	2	2	5	2	6	8	4	7	6	4	2		2	8	4	7	5	4	4	4	6	3	3	7	4	6	4
fig|6666666.374196.peg.34	3	2	1	2	2	1	2	1	1	3	2	2	3	1	2	2	2	0	4	1	1	1	10	8	1	10	1	1	2	1	2	3	7	2		1	3	1	2	2	2	3	2	1	3	2	2	2	1
fig|6666666.374196.peg.35	3	6	6	3	2	9	3	5	5	2	4	3	4	4	5	5	4	7	2	5	7	5	1	2	2	2	13	6	5	8	7	4	2	8	1		2	10	4	5	5	2	5	4	1	4	3	6	7
fig|6666666.374196.peg.36	4	5	3	2	5	2	4	3	0	7	4	5	5	5	4	5	5	2	6	4	3	4	3	4	3	3	3	4	5	4	3	7	4	4	3	2		4	5	6	4	4	6	2	5	4	6	4	2
fig|6666666.374196.peg.37	5	6	7	8	4	5	5	3	6	3	6	4	4	3	6	9	5	4	3	4	7	5	1	2	5	1	7	7	4	6	8	5	2	7	1	10	4		5	7	7	3	5	3	3	4	6	5	4
fig|6666666.374196.peg.38	9	4	2	3	5	3	5	4	3	4	6	5	6	5	4	6	4	3	5	5	4	3	2	3	5	2	3	4	3	4	3	4	4	5	2	4	5	5		5	4	5	7	2	4	8	5	5	2
fig|6666666.374196.peg.39	4	8	6	7	4	4	8	4	4	5	4	6	5	5	6	8	6	5	5	4	7	4	1	2	6	2	4	5	5	7	4	4	3	4	2	5	6	7	5		5	4	5	3	3	5	7	7	4
fig|6666666.374196.peg.40	4	6	4	4	8	5	5	2	3	4	6	5	6	6	8	7	7	3	5	5	5	5	2	2	5	2	3	5	7	5	5	7	2	4	2	5	4	7	4	5		4	7	2	5	7	5	6	4
fig|6666666.374196.peg.41	6	4	2	3	4	3	3	2	2	4	4	6	6	4	6	5	5	1	8	3	2	2	4	5	3	4	3	3	4	3	5	4	6	4	3	2	4	3	5	4	4		5	1	5	3	6	4	2
fig|6666666.374196.peg.42	6	5	4	6	5	3	7	4	2	3	7	7	6	5	5	5	6	3	6	3	5	4	2	3	6	2	3	2	4	4	4	6	4	6	2	5	6	5	7	5	7	5		2	7	6	5	6	3
fig|6666666.374196.peg.43	3	3	1	6	2	7	5	7	5	1	3	4	2	2	2	3	2	5	1	5	4	5	1	1	4	1	1	5	3	10	3	2	1	3	1	4	2	3	2	3	2	1	2		2	3	1	6	5
fig|6666666.374196.peg.44	5	6	3	3	4	1	4	3	2	6	4	5	5	4	5	4	5	2	4	2	3	3	4	4	4	4	2	2	5	3	3	4	4	3	3	1	5	3	4	3	5	5	7	2		5	4	3	2
fig|6666666.374196.peg.45	6	9	7	9	4	5	4	3	3	5	7	5	3	6	5	7	5	4	4	6	5	6	2	1	6	2	4	5	7	7	4	5	2	7	2	4	4	4	8	5	7	3	6	3	5		4	5	4
fig|6666666.374196.peg.46	6	6	4	5	8	3	5	3	1	7	4	5	7	6	6	5	7	3	6	2	6	4	2	3	5	4	4	3	7	6	4	6	3	4	2	3	6	6	5	7	5	6	5	1	4	4		5	5
fig|6666666.374196.peg.47	5	4	4	6	6	6	6	4	1	4	4	4	5	6	5	7	5	4	4	5	7	5	2	2	4	2	1	6	4	9	6	5	2	6	2	6	4	5	5	7	6	4	6	6	3	5	5		6
fig|6666666.374196.peg.48	4	3	4	10	3	8	3	7	4	2	2	3	2	4	4	4	3	5	1	8	5	6	1	2	2	1	6	7	3	4	5	3	1	4	1	7	2	4	2	4	4	2	3	5	2	4	5	6
fig|6666666.374196.peg.49	4	6	7	6	1	9	2	4	7	3	6	2	3	5	2	5	5	5	1	6	7	6	1	1	4	1	4	6	5	5	5	2	1	5	1	6	3	4	3	3	3	2	4	3	3	4	5	5	6
fig|6666666.374196.peg.50	7	6	5	6	6	3	6	5	2	4	4	7	3	7	5	7	7	4	3	5	6	6	2	2	7	1	2	7	7	7	7	4	2	6	1	4	4	5	4	5	8	4	5	1	3	7	4	6	5
fig|6666666.374196.peg.51	5	7	3	5	5	5	7	4	2	3	5	4	7	5	7	8	7	3	6	4	3	4	1	3	7	3	4	4	4	3	7	5	4	6	2	6	7	7	5	7	7	5	9	3	5	4	6	8	5
fig|6666666.374196.peg.52	7	5	3	4	6	2	3	3	2	6	3	4	6	4	5	5	6	2	4	4	3	4	3	3	5	3	3	3	4	3	3	5	3	4	3	4	5	5	5	4	6	5	6	2	7	4	5	4	1
fig|6666666.374196.peg.53	2	4	8	5	3	4	5	5	2	2	3	4	3	6	4	6	6	4	3	5	10	7	1	1	4	2	5	4	3	7	5	3	2	5	1	8	3	5	6	5	5	3	6	4	3	4	4	5	5
fig|6666666.374196.peg.54	2	7	6	4	3	9	3	9	5	3	3	3	2	5	4	4	4	4	2	5	5	5	1	1	3	1	7	8	7	9	7	2	1	5	1	6	1	4	2	6	3	2	3	3	2	4	3	4	5
fig|6666666.374196.peg.55	4	6	6	6	4	4	4	5	5	4	7	6	4	7	5	7	4	4	4	4	7	6	1	2	3	2	4	6	4	6	4	5	2	6	1	8	3	6	6	6	5	5	6	3	4	5	4	7	4
fig|6666666.374196.peg.56	3	4	6	7	2	7	2	1	6	2	4	3	2	3	4	4	4	6	2	4	3	5	1	1	1	1	7	3	4	4	4	3	1	6	1	4	2	4	2	4	2	3	2	6	1	3	2	4	4
fig|6666666.374196.peg.57	4	6	4	6	6	4	4	7	3	3	5	5	3	5	5	6	4	4	2	3	6	9	1	2	4	1	3	5	7	4	7	4	2	6	1	6	4	6	4	7	7	3	5	3	4	5	6	6	7
fig|6666666.374196.peg.58	3	3	7	6	2	10	3	5	5	2	3	2	2	4	2	6	3	3	1	3	3	5	1	1	3	1	7	8	3	6	5	3	1	5	1	7	3	5	4	2	3	2	4	6	2	4	2	4	9
fig|6666666.374196.peg.59	5	4	2	3	5	2	5	2	1	5	3	6	7	5	4	4	5	1	6	3	4	3	4	4	4	4	2	2	4	3	4	8	5	3	3	3	6	4	4	4	6	6	7	2	6	4	5	4	2
fig|6666666.374196.peg.60	5	4	3	8	5	4	6	4	3	4	6	5	5	6	8	6	6	3	5	4	4	5	1	4	3	2	5	7	6	4	8	6	3	7	3	8	5	5	4	6	7	5	7	3	4	6	4	9	6
fig|6666666.374196.peg.61	2	3	6	6	3	4	3	3	3	2	3	3	2	2	4	6	4	6	2	4	2	9	1	2	2	1	5	5	4	8	6	2	1	6	1	4	2	5	2	3	3	2	3	9	2	3	3	4	4
fig|6666666.374196.peg.62	6	4	2	2	4	2	3	2	1	6	5	4	4	3	2	4	4	1	5	3	4	3	4	4	4	3	2	2	3	3	3	5	4	3	4	2	5	4	7	3	4	4	6	2	5	4	5	5	2
fig|6666666.374196.peg.63	8	5	3	4	8	3	7	4	4	4	7	5	5	5	5	4	6	3	4	4	5	5	2	2	4	2	2	4	5	6	5	5	2	5	2	5	5	5	6	5	8	3	5	2	6	4	9	6	4
fig|6666666.374196.peg.64	5	7	2	3	4	3	5	3	1	6	4	7	4	5	4	5	5	2	5	3	6	5	2	2	4	2	3	3	4	5	4	6	2	3	2	6	3	3	5	6	6	5	6	3	4	5	4	8	5
fig|6666666.374196.peg.65	2	3	5	4	2	4	3	4	8	2	4	2	1	2	3	2	3	7	1	2	4	5	0	0	2	1	2	5	3	4	3	1	1	3	0	4	2	3	3	3	2	1	2	9	2	3	2	4	3
fig|6666666.374196.peg.66	2	3	4	9	4	9	3	8	5	2	4	4	3	5	2	5	3	7	2	7	5	4	1	2	4	1	7	6	4	6	5	1	2	4	1	6	3	4	4	5	3	3	5	8	2	4	4	5	8
fig|6666666.374196.peg.67	5	4	6	9	5	7	3	4	2	3	4	5	3	6	3	7	3	4	2	7	7	8	1	1	2	1	5	8	5	8	5	4	1	6	1	7	4	6	5	6	3	3	5	9	3	4	5	7	5
fig|6666666.374196.peg.68	6	5	3	7	4	4	6	4	4	3	5	5	4	3	8	7	7	4	4	6	8	6	2	3	4	2	4	6	3	5	3	4	2	5	1	7	3	6	6	9	5	5	5	4	4	5	4	6	5
fig|6666666.374196.peg.69	5	7	7	7	3	4	4	4	6	2	3	4	4	4	5	8	5	3	2	6	8	6	1	2	4	2	5	8	7	9	6	4	2	6	1	6	3	7	4	6	6	2	2	2	4	7	4	8	5
fig|6666666.374196.peg.70	7	7	4	3	4	4	5	2	1	6	5	5	7	6	6	5	6	2	4	3	6	3	3	3	7	3	2	3	4	5	5	8	3	3	2	5	8	4	5	5	6	5	7	3	5	4	9	5	4
fig|6666666.374196.peg.71	5	7	3	3	5	2	5	2	2	5	6	5	6	5	6	5	7	1	4	3	4	3	3	3	4	3	3	2	5	3	4	6	4	3	2	3	5	4	5	6	5	4	4	1	8	4	5	5	2
fig|6666666.374196.peg.72	3	4	5	6	3	4	3	4	3	1	3	2	3	2	4	4	2	3	1	1	3	3	1	1	4	1	4	5	3	3	4	2	1	6	1	3	2	5	2	4	2	2	3	3	2	4	4	5	5
fig|6666666.374196.peg.73	6	6	6	5	6	4	6	6	1	3	7	5	4	7	4	7	5	5	3	6	7	6	2	2	6	3	4	4	6	6	4	3	2	3	2	4	5	4	5	5	6	4	4	4	4	7	5	7	4
fig|6666666.374196.peg.74	3	5	6	6	3	6	4	6	4	3	5	5	2	4	3	7	5	4	3	6	7	6	2	2	3	2	6	5	8	8	9	5	2	8	2	9	3	9	5	5	6	4	3	5	4	8	4	5	6
fig|6666666.374196.peg.75	2	3	5	4	3	6	3	6	11	1	4	3	2	4	4	6	6	5	3	6	5	2	1	1	2	1	12	5	9	7	7	4	2	7	1	8	3	3	4	3	3	3	2	3	2	4	2	3	8
fig|6666666.374196.peg.76	5	5	4	5	4	5	5	3	4	4	7	6	5	8	8	7	5	3	4	4	4	6	2	2	6	2	4	6	5	5	5	5	3	6	1	6	5	5	7	6	8	6	5	3	3	5	8	8	5
fig|6666666.374196.peg.77	3	6	3	2	5	3	4	2	2	6	3	5	6	5	4	5	6	1	7	4	4	4	3	4	3	4	3	3	5	4	3	7	4	3	3	2	9	3	6	6	8	5	6	2	4	3	5	4	3
fig|6666666.374196.peg.78	5	4	9	11	5	6	4	7	3	3	6	5	4	6	6	8	6	6	2	5	6	6	1	1	4	1	5	10	7	7	5	2	2	8	1	6	4	7	5	5	4	5	3	4	3	6	7	8	6
fig|6666666.374196.peg.79	7	5	6	6	5	3	6	4	2	4	7	5	2	4	6	6	4	4	3	4	6	6	1	2	4	2	4	6	6	8	6	5	1	8	1	6	4	4	5	7	5	4	6	7	4	7	3	6	3
fig|6666666.374196.peg.80	7	7	3	6	4	4	7	4	1	4	8	5	6	5	5	7	5	4	4	4	6	7	2	2	5	2	5	4	6	5	7	6	2	7	2	5	7	5	6	6	4	4	7	4	5	7	7	7	6
fig|6666666.374196.peg.81	86	5	5	5	6	3	4	4	2	5	7	4	5	4	4	4	3	2	4	5	5	4	2	4	4	3	3	4	3	5	5	5	3	5	3	3	4	5	9	3	4	5	6	4	5	5	6	6	3
fig|6666666.374196.peg.82	6	5	2	4	4	3	6	3	2	6	4	7	8	6	5	5	7	2	5	3	4	3	2	5	4	3	3	3	3	5	6	7	4	4	3	4	6	6	6	6	7	6	8	1	8	4	5	5	4
fig|6666666.374196.peg.83	4	6	6	8	4	4	8	6	2	3	4	5	4	4	9	8	5	4	3	7	7	6	2	2	6	1	3	3	6	5	6	6	2	5	1	5	4	6	6	6	7	3	5	4	4	9	4	7	3
fig|6666666.374196.peg.84	4	6	4	6	4	5	3	3	4	3	5	4	3	5	6	5	5	5	2	8	5	8	1	2	4	2	6	9	6	6	7	4	2	8	1	9	4	7	4	8	6	4	4	4	4	4	5	5	7
fig|6666666.374196.peg.85	5	6	9	11	4	6	4	5	4	3	5	4	3	4	5	5	6	4	3	7	4	6	1	1	5	2	5	6	5	7	3	3	2	8	1	7	3	8	3	6	4	3	3	7	3	6	4	4	6
fig|6666666.374196.peg.86	5	5	7	5	5	3	4	4	3	3	7	5	5	4	5	8	5	3	3	7	5	4	1	2	4	2	5	7	4	11	6	4	2	7	1	6	4	5	5	6	4	3	5	3	4	6	5	7	4
fig|6666666.374196.peg.87	4	4	3	8	4	5	4	7	2	2	3	3	3	3	3	7	4	4	3	4	6	5	1	1	3	1	8	4	3	5	5	1	2	5	1	8	2	5	3	4	4	1	4	6	2	6	5	4	6
fig|6666666.374196.peg.88	5	4	7	7	4	7	6	5	2	2	6	5	2	3	5	7	4	4	2	6	4	7	1	2	3	1	3	8	7	6	8	3	2	7	1	5	4	6	7	7	5	2	4	5	3	5	5	7	10
fig|6666666.374196.peg.89	7	6	3	7	6	4	4	3	4	6	5	5	5	5	7	7	5	2	5	4	5	4	2	3	5	3	2	4	3	5	5	5	3	6	2	4	5	6	5	5	6	8	8	4	4	6	7	6	3
fig|6666666.374196.peg.90	4	3	2	2	4	2	4	2	0	5	3	3	4	3	4	2	3	1	5	2	2	2	4	4	4	4	1	2	3	3	3	4	4	2	5	1	4	2	4	3	3	5	4	1	5	3	4	4	2
fig|6666666.374196.peg.91	4	5	4	6	3	6	4	6	5	4	6	5	2	3	3	6	6	4	3	3	6	5	1	2	3	1	6	10	8	7	5	3	2	6	1	5	3	5	3	6	5	2	5	7	3	6	5	7	6
fig|6666666.374196.peg.92	4	5	9	6	4	8	4	7	2	2	5	3	3	3	5	9	6	7	2	7	6	8	1	2	4	1	7	8	9	9	4	1	2	8	1	5	3	5	4	6	4	2	3	6	3	4	5	5	6
fig|6666666.374196.peg.93	3	5	4	6	3	5	4	4	7	2	3	0	2	3	4	5	3	3	2	7	5	6	1	1	3	1	5	2	4	3	3	1	1	5	1	7	2	5	2	4	4	1	3	3	2	4	3	3	8
fig|6666666.374196.peg.94	2	1	2	4	2	3	4	1	3	1	1	1	1	3	2	1	3	2	0	4	2	1	1	0	3	0	5	5	2	2	4	1	1	5	0	3	2	2	3	3	2	1	1	3	1	3	1	3	5
fig|6666666.374196.peg.95	4	4	9	9	4	7	3	7	6	3	3	3	4	6	2	6	4	6	1	5	6	5	1	2	3	1	5	4	9	7	6	3	2	6	1	6	2	7	4	4	3	2	3	5	3	7	3	8	10
fig|6666666.374196.peg.96	7	3	3	6	4	3	9	3	2	4	6	3	4	5	5	4	5	4	3	5	5	4	2	2	4	2	6	3	4	4	6	6	2	4	1	6	6	9	6	6	6	3	6	3	4	6	6	6	4
fig|6666666.374196.peg.97	5	7	6	4	7	1	6	2	1	5	5	7	4	4	5	7	5	3	4	5	6	5	3	3	4	3	4	4	5	5	6	4	3	5	2	3	5	6	6	7	6	5	4	2	5	4	5	5	3
fig|6666666.374196.peg.98	7	6	4	7	6	4	5	3	3	4	5	5	5	6	9	7	5	2	4	4	4	7	2	3	5	2	3	4	6	10	7	5	3	6	2	4	5	5	6	6	7	5	6	6	4	7	7	10	5
fig|6666666.374196.peg.99	5	5	4	4	6	4	7	6	2	3	6	7	5	8	4	4	7	4	4	8	7	10	2	3	5	2	4	11	6	5	8	4	3	6	1	7	4	5	5	5	3	6	6	3	2	5	5	8	4
fig|6666666.374196.peg.100	5	5	5	4	5	3	5	2	3	6	5	8	5	5	5	7	5	3	5	5	7	5	3	3	7	2	5	5	7	7	6	6	3	4	2	6	3	5	5	6	8	5	6	2	4	7	6	4	4
fig|6666666.374196.peg.102	5	7	6	8	4	5	8	6	4	2	4	3	5	4	6	8	6	3	2	5	7	5	1	2	5	2	6	4	4	8	5	4	2	7	1	8	6	4	6	6	4	2	6	5	4	5	5	6	6
fig|6666666.374196.peg.103	4	7	6	9	3	5	5	8	2	4	7	3	3	5	4	4	6	4	3	6	6	3	1	1	3	2	8	4	5	6	7	3	2	6	1	7	4	6	3	4	3	2	3	7	2	6	3	6	6
fig|6666666.374196.peg.104	5	4	6	7	5	3	5	9	6	4	5	4	3	5	6	5	6	8	2	6	9	7	1	2	3	1	4	10	6	10	6	4	2	9	1	6	4	6	5	5	4	2	3	5	2	7	6	9	6
fig|6666666.374196.peg.105	4	6	7	10	6	5	8	4	4	2	9	7	4	8	8	5	5	3	4	4	5	6	2	2	5	2	3	4	7	6	7	4	2	5	2	4	5	8	6	7	7	4	6	7	6	5	6	7	6
fig|6666666.374196.peg.106	4	6	7	4	6	2	4	4	2	4	8	8	3	6	6	5	5	4	2	4	7	5	2	2	3	2	4	8	5	9	6	3	2	6	1	8	3	5	4	5	5	4	5	4	5	6	6	7	5
fig|6666666.374196.peg.107	3	2	9	6	3	5	2	5	10	2	4	4	2	4	3	4	4	3	1	5	4	8	1	1	2	1	5	6	3	5	4	2	1	6	1	4	2	5	3	3	3	2	2	4	3	4	3	3	7
fig|6666666.374196.peg.108	4	5	4	5	5	6	6	5	4	3	5	4	5	4	7	7	5	5	4	5	8	4	2	3	6	2	6	3	6	6	6	3	2	5	1	3	4	7	6	6	5	4	5	3	3	7	7	6	5
fig|6666666.374196.peg.109	2	2	5	4	3	5	1	2	7	1	1	2	1	2	3	4	3	4	2	2	2	2	0	0	1	1	4	3	1	3	3	1	1	3	0	3	1	4	2	2	2	1	1	2	1	3	1	2	5
fig|6666666.374196.peg.110	2	1	7	2	3	5	0	7	6	1	4	1	1	2	2	4	2	3	1	7	3	3	0	1	1	1	6	8	4	5	4	0	1	6	1	6	2	3	2	3	2	1	2	3	1	3	1	2	4
fig|6666666.374196.peg.111	3	2	3	5	4	5	3	8	4	2	4	3	2	3	2	4	3	4	1	3	4	5	1	1	2	1	2	3	3	5	4	1	1	5	1	3	2	4	4	3	3	2	4	6	2	3	3	5	3
fig|6666666.374196.peg.112	3	4	6	5	3	9	5	5	6	2	4	4	1	4	3	5	6	7	2	9	9	5	1	1	3	1	7	4	6	5	5	2	2	6	1	8	3	3	3	8	4	2	2	5	2	4	3	4	5
fig|6666666.374196.peg.113	3	8	7	9	4	4	5	7	2	2	4	3	3	5	5	7	3	5	2	7	6	7	1	1	3	1	9	8	4	6	4	3	1	6	1	4	3	6	3	6	4	3	3	6	2	8	6	4	7
fig|6666666.374196.peg.114	3	2	6	8	3	3	3	6	5	2	3	3	1	2	4	2	3	5	1	5	5	3	1	1	2	1	3	6	4	4	3	2	1	5	1	7	2	6	2	2	3	1	3	1	1	4	3	4	11
fig|6666666.374196.peg.115	3	2	6	5	2	9	4	4	7	1	4	3	2	4	3	4	5	5	1	5	4	6	1	1	2	1	5	6	3	6	3	2	1	5	1	7	1	6	2	5	3	1	4	6	1	3	2	5	7
fig|6666666.374196.peg.116	2	4	4	3	3	6	2	6	3	2	2	1	1	2	4	4	2	3	1	5	5	3	1	1	2	1	7	5	3	6	3	1	1	3	0	5	2	4	2	3	2	2	2	8	2	6	2	2	5
fig|6666666.374196.peg.117	4	5	10	9	3	5	3	5	1	2	3	3	3	4	4	4	5	6	2	6	4	8	1	2	4	1	5	7	4	9	5	2	2	7	1	12	3	7	2	5	5	2	4	3	2	6	3	6	7
fig|6666666.374196.peg.118	6	6	5	7	2	7	4	6	5	3	4	3	2	6	6	6	7	4	3	3	6	6	1	2	3	2	3	6	5	6	6	3	2	9	1	8	4	6	4	6	5	4	4	4	2	4	5	6	6
fig|6666666.374196.peg.119	3	5	12	7	3	7	5	5	3	2	4	4	2	4	3	4	4	8	2	4	3	4	1	1	2	1	9	6	3	6	4	2	2	9	1	5	3	6	4	7	4	2	4	3	2	4	5	6	7
fig|6666666.374196.peg.120	5	3	6	6	4	7	4	4	3	2	4	3	3	2	2	3	2	4	2	3	5	6	1	1	3	1	5	5	5	7	4	3	1	7	1	5	4	5	4	6	4	2	2	4	2	5	3	4	6
fig|6666666.374196.peg.121	2	3	5	3	3	5	3	8	4	2	2	1	1	3	3	4	3	4	1	5	3	4	1	1	1	1	4	3	4	4	3	2	1	4	1	6	2	5	2	4	3	2	4	3	1	3	3	3	5
fig|6666666.374196.peg.122	4	6	8	11	4	5	3	4	4	3	4	3	3	5	7	6	4	7	2	6	3	7	1	2	3	1	7	4	5	4	6	1	1	7	1	6	2	3	2	7	4	2	3	9	3	7	4	7	7
fig|6666666.374196.peg.123	4	3	6	11	4	4	3	8	6	2	4	3	3	3	3	4	3	6	1	4	5	8	1	1	1	1	6	4	4	7	3	2	2	5	1	5	2	7	3	6	3	1	3	5	1	3	3	5	7
fig|6666666.374196.peg.124	3	5	7	4	4	5	3	5	3	2	4	3	2	2	3	4	6	3	2	4	6	7	1	0	3	2	6	5	4	4	6	3	1	4	1	10	2	5	2	2	3	2	3	4	2	2	4	5	6
fig|6666666.374196.peg.125	3	5	5	7	2	7	2	2	5	1	2	1	2	5	4	4	1	6	1	4	3	4	1	1	3	1	6	7	4	4	3	3	1	6	1	6	2	5	2	3	3	2	3	6	1	4	3	5	7
fig|6666666.374196.peg.126	5	4	9	6	3	5	4	3	6	2	3	4	1	4	4	4	6	4	2	8	7	7	1	1	3	1	5	7	6	7	5	2	1	6	1	6	4	5	2	7	3	2	2	6	2	5	4	4	3
fig|6666666.374196.peg.127	3	5	6	8	3	9	5	8	5	3	5	4	2	4	3	6	6	6	2	7	5	6	1	1	3	1	8	6	4	8	7	5	2	4	1	9	2	6	4	6	4	2	5	5	2	5	5	6	10
fig|6666666.374196.peg.128	3	3	6	6	5	7	3	8	5	2	5	5	2	3	4	7	3	9	2	5	7	3	1	1	3	1	7	7	4	8	5	2	2	5	1	5	3	8	4	3	4	2	4	8	3	4	3	5	7
fig|6666666.374196.peg.129	3	3	9	4	5	6	4	5	4	2	4	4	2	3	5	7	6	6	3	8	5	5	1	2	5	1	9	8	5	11	5	3	1	7	1	8	3	6	3	7	4	3	4	5	2	5	6	4	7
fig|6666666.374196.peg.130	1	3	6	4	2	4	3	4	3	1	2	2	1	3	2	2	1	8	1	4	3	3	1	1	3	1	7	7	5	6	4	2	1	4	1	6	1	3	2	5	1	2	2	2	1	3	3	2	4
fig|6666666.374196.peg.131	4	3	9	4	4	4	4	5	6	2	4	4	3	2	3	5	5	5	2	6	7	9	1	1	2	2	9	7	2	9	6	3	1	7	1	8	2	8	4	5	3	2	4	5	3	6	4	4	7
fig|6666666.374196.peg.132	3	4	6	5	4	9	3	6	4	2	6	4	4	5	3	7	4	11	2	4	5	5	1	1	3	1	9	5	3	4	3	2	1	6	1	8	2	6	3	7	3	2	4	6	3	3	2	4	9
fig|6666666.374196.peg.133	3	4	4	10	2	4	5	4	5	2	6	4	2	5	5	5	3	7	3	4	7	8	1	1	4	2	6	5	4	6	7	4	1	4	1	7	3	8	4	5	4	2	3	9	3	3	3	5	6
fig|6666666.374196.peg.134	2	2	6	7	2	2	2	2	5	1	1	3	2	2	2	4	3	6	1	3	5	4	1	1	0	1	7	4	3	4	4	2	1	3	0	6	2	5	3	3	2	1	2	6	2	4	3	2	3
fig|6666666.374196.peg.135	2	3	6	6	3	7	3	7	6	3	6	4	3	4	4	7	5	7	3	5	6	6	1	1	4	1	9	7	3	9	6	3	1	6	1	7	3	8	3	6	4	2	4	5	3	6	3	6	8
fig|6666666.374196.peg.136	4	4	5	9	7	6	5	4	5	3	5	4	3	7	6	8	6	4	4	8	5	5	2	2	3	2	6	9	6	9	7	3	2	7	1	4	3	10	5	8	6	3	4	3	2	6	6	7	4
fig|6666666.374196.peg.137	3	4	5	6	3	4	5	5	3	2	5	3	3	5	5	4	4	4	4	5	6	6	1	2	2	1	5	6	3	4	7	3	2	5	2	6	5	6	5	7	4	4	5	1	3	7	4	7	5
fig|6666666.374196.peg.138	4	4	6	6	3	5	3	5	6	2	4	3	2	3	3	4	3	9	2	6	3	3	1	1	2	1	7	7	5	5	3	3	2	8	1	8	4	7	3	4	3	1	3	7	3	7	3	3	6
fig|6666666.374196.peg.139	2	6	5	9	4	4	4	7	4	2	4	2	2	4	2	6	3	4	2	7	6	6	1	1	3	1	6	7	4	5	8	2	2	4	1	9	4	7	3	5	3	2	4	4	2	5	3	3	11
fig|6666666.374196.peg.140	4	4	9	6	3	8	3	3	4	1	3	4	3	1	4	4	3	2	2	2	6	4	1	1	4	1	7	4	3	5	4	2	2	6	1	6	3	10	3	5	3	3	4	5	2	5	4	3	5
fig|6666666.374196.peg.141	3	6	6	9	4	4	3	3	2	3	3	3	5	4	4	5	7	2	2	6	6	8	1	2	3	2	8	6	9	6	6	2	2	8	1	5	3	7	4	8	4	4	4	3	2	6	6	6	3
fig|6666666.374196.peg.142	3	3	5	3	3	5	3	4	4	2	3	3	3	4	3	5	5	3	2	5	8	5	1	0	2	1	5	7	6	4	7	2	1	4	1	4	2	7	3	5	3	2	3	6	1	3	3	3	3
fig|6666666.374196.peg.143	4	7	5	7	4	6	4	5	3	2	6	2	2	4	4	4	4	3	3	5	5	4	1	2	3	2	7	8	2	6	8	3	1	6	1	8	2	5	2	4	5	2	4	6	3	4	3	5	5
fig|6666666.374196.peg.144	4	6	7	7	6	4	4	5	2	2	5	6	4	4	5	4	5	4	2	8	8	6	1	2	3	1	5	6	5	7	5	3	2	6	1	4	4	5	3	9	5	4	5	6	3	6	3	8	11
fig|6666666.374196.peg.145	4	5	3	7	4	4	5	6	5	3	5	3	3	3	5	7	3	10	3	8	7	7	1	2	5	2	3	7	6	7	4	3	2	6	1	6	4	6	5	3	4	3	6	4	3	5	4	7	7
fig|6666666.374196.peg.146	4	7	3	7	4	7	7	5	5	4	5	5	3	7	5	6	5	4	4	4	5	7	2	2	4	2	5	5	7	4	4	6	2	4	2	8	4	6	7	7	7	6	4	5	3	6	6	6	7
fig|6666666.374196.peg.147	3	4	7	7	3	5	3	3	3	2	5	3	2	4	5	3	3	5	3	5	4	5	1	1	3	1	6	6	3	7	4	3	1	4	1	3	2	6	2	5	3	3	2	5	2	4	4	4	5
fig|6666666.374196.peg.148	3	4	4	7	2	8	4	2	4	2	5	2	2	4	3	3	3	6	2	3	6	2	1	1	2	1	6	3	5	5	5	2	2	5	1	11	2	7	3	7	3	2	4	7	1	3	4	5	11
fig|6666666.374196.peg.149	7	6	4	5	6	4	5	4	2	5	6	7	5	5	4	5	6	4	5	3	8	5	2	3	3	2	3	4	6	4	5	6	4	4	2	4	5	3	4	5	5	6	8	3	5	5	5	4	4
fig|6666666.374196.peg.150	3	3	8	7	1	6	3	1	8	2	2	5	1	4	4	4	4	7	2	9	2	7	0	1	2	1	7	8	5	7	7	3	1	5	0	6	3	4	3	6	2	2	4	5	3	5	3	2	5
fig|6666666.374196.peg.151	2	2	3	6	1	2	2	2	5	2	1	1	1	3	2	2	1	2	1	3	4	3	0	0	1	1	2	3	3	4	2	1	0	3	0	4	1	2	1	2	1	1	2	4	1	3	1	3	3
fig|6666666.374196.peg.152	4	5	9	11	3	5	2	6	7	3	4	1	2	3	4	4	3	4	1	4	4	7	1	1	3	1	8	5	5	5	9	2	1	5	1	10	2	6	2	3	4	2	3	9	2	5	3	4	11
fig|6666666.374196.peg.153	3	2	4	5	3	6	2	6	3	2	3	2	2	3	3	4	3	9	1	5	5	7	1	2	2	1	3	7	4	6	3	2	2	7	1	5	2	7	2	4	2	2	3	10	2	4	3	6	8
fig|6666666.374196.peg.154	1	3	4	8	2	5	2	2	8	2	3	2	2	3	4	4	4	5	2	4	4	7	1	1	1	1	9	4	4	6	4	1	1	3	1	5	2	4	2	4	3	2	3	5	2	5	3	5	7
fig|6666666.374196.peg.155	2	4	3	4	4	8	4	7	6	2	3	1	2	1	4	2	4	11	2	3	5	5	1	1	2	1	4	3	3	4	3	2	1	4	0	8	2	4	2	4	4	1	3	3	2	3	3	4	10
fig|6666666.374196.peg.156	2	4	6	6	3	5	2	3	3	1	2	2	1	3	2	2	2	6	0	4	3	4	1	1	1	0	6	5	2	4	3	2	0	4	0	4	1	4	1	4	2	1	1	7	1	3	3	4	4
fig|6666666.374196.peg.157	4	3	9	7	4	7	5	6	5	1	3	4	1	2	5	6	4	6	2	9	7	7	1	1	3	1	6	10	7	5	4	3	1	6	1	8	3	4	4	3	6	2	4	5	3	4	3	4	9
fig|6666666.374196.peg.158	3	2	4	5	1	3	3	2	4	1	2	1	1	1	2	2	2	5	0	5	4	3	0	1	2	1	3	4	2	6	4	1	0	4	1	3	2	4	1	3	1	1	1	5	1	2	2	4	4
fig|6666666.374196.peg.159	3	5	7	5	2	4	3	4	3	2	6	3	3	2	4	5	4	6	2	2	5	4	1	1	3	1	5	3	3	6	5	2	2	4	1	6	2	6	3	5	3	2	3	6	2	7	2	4	4
fig|6666666.374196.peg.160	4	4	3	2	5	2	4	2	2	6	3	4	6	6	2	3	5	1	5	2	3	2	4	3	5	3	2	3	4	2	3	5	3	3	3	2	7	3	6	3	5	4	4	2	5	2	5	5	2
fig|6666666.374196.peg.161	4	2	6	6	4	6	4	5	3	2	4	2	2	5	5	5	4	5	1	6	7	7	1	1	4	2	7	8	4	5	9	2	2	5	1	4	2	5	5	4	4	2	3	3	1	7	6	7	7
fig|6666666.374196.peg.162	4	5	8	7	4	7	5	7	6	2	3	3	3	3	4	6	3	6	2	8	9	2	1	1	3	1	6	9	5	7	8	2	1	6	1	9	2	7	3	3	5	2	4	4	2	5	4	6	7
fig|6666666.374196.peg.163	2	1	4	6	1	6	2	6	7	1	2	1	1	2	4	3	4	3	1	4	4	4	0	1	0	1	4	6	4	5	4	2	0	2	0	3	2	4	1	2	2	2	3	5	1	3	2	4	4
fig|6666666.374196.peg.164	3	7	4	5	6	2	6	4	2	4	5	3	4	6	5	8	6	2	3	3	5	4	2	3	4	2	4	4	6	6	7	4	3	4	2	4	3	6	7	8	4	5	5	3	4	6	6	7	5
fig|6666666.374196.peg.165	3	5	5	6	2	2	1	6	2	2	5	2	2	4	4	5	3	7	2	4	6	3	1	1	2	1	4	4	3	2	5	3	1	7	1	5	1	4	3	5	4	3	4	2	3	5	2	2	6
fig|6666666.374196.peg.166	4	3	3	8	4	8	4	8	0	3	5	4	3	5	6	5	5	3	3	4	6	9	1	2	5	1	7	5	4	6	7	3	2	5	1	7	3	5	2	7	4	3	4	5	3	5	4	7	8
fig|6666666.374196.peg.167	5	7	4	7	5	6	5	3	4	4	9	4	4	6	6	8	7	2	4	6	5	4	2	2	7	2	4	7	3	7	9	4	3	7	1	5	5	7	6	5	6	6	5	3	3	7	4	8	3
fig|6666666.374196.peg.168	4	6	5	7	4	8	4	4	5	4	5	5	4	5	8	5	5	7	3	10	7	7	2	1	3	2	5	5	4	9	6	6	1	8	1	8	3	7	5	6	6	3	4	5	3	8	4	6	7
fig|6666666.374196.peg.169	4	7	5	8	2	5	5	6	5	4	5	3	3	5	4	7	7	4	2	6	7	6	1	1	5	1	7	9	6	5	5	3	1	5	2	7	3	9	4	6	6	4	5	4	4	4	4	6	7
fig|6666666.374196.peg.170	4	3	11	9	3	9	3	7	6	2	4	4	2	2	3	7	6	3	1	6	3	5	1	1	2	1	7	7	4	9	6	1	1	8	1	12	2	10	4	3	5	3	3	8	4	5	3	3	5
fig|6666666.374196.peg.171	5	3	9	7	6	4	6	5	3	3	5	4	3	7	6	7	9	3	3	8	5	6	2	2	5	2	6	9	7	11	10	5	2	11	2	6	4	7	4	6	8	2	4	3	3	9	5	7	7
fig|6666666.374196.peg.172	4	8	8	7	5	5	8	4	2	4	5	4	4	5	4	7	5	2	4	7	6	5	2	2	6	2	6	7	6	8	6	4	2	7	1	3	4	9	4	6	5	4	5	4	3	6	5	6	3
fig|6666666.374196.peg.173	3	3	6	6	3	4	3	5	7	2	3	4	2	3	6	4	2	7	2	2	7	7	1	1	3	1	4	4	3	5	2	3	1	3	1	3	2	5	3	4	4	1	5	6	2	3	2	4	6
fig|6666666.374196.peg.174	4	4	4	4	4	4	4	3	2	3	6	6	4	4	6	4	8	5	3	4	5	8	1	3	4	2	4	4	4	4	5	3	2	5	1	4	5	6	3	6	5	4	5	6	2	8	5	7	6
fig|6666666.374196.peg.175	5	6	4	5	5	5	5	6	3	3	5	6	4	5	3	4	5	4	3	7	6	3	1	2	5	2	4	7	6	5	8	4	2	7	2	5	3	8	4	4	4	4	4	2	4	6	7	7	8
fig|6666666.374196.peg.176	3	2	9	8	2	2	5	1	7	1	1	2	2	3	5	6	6	5	2	6	2	3	1	1	2	1	11	4	5	7	6	1	1	8	1	5	2	5	2	4	2	2	4	2	2	4	5	3	7
fig|6666666.374196.peg.177	2	4	6	4	2	5	3	3	3	2	2	2	2	3	3	4	5	7	2	5	2	2	1	1	2	1	3	5	4	4	2	2	1	5	0	4	2	2	2	4	4	1	2	4	2	3	3	5	5
[truncated: 128 more columns]
