# Supplementary material for: Expanding the Diversity of Myoviridae Phages Infecting Lactobacillus Plantarum - A Novel Lineage of Lactobacillus Phages Comprising Five New Members
Source: Preprints.org preprint supplement (doi:10.20944/preprints201812.0026.v1), 2018-12-03
Supplement: Supplementary file 2 [file Spreadsheet S2.xlsx]

## Sheet: Sheet1
	fig|6666666.374193.peg.173	fig|6666666.374193.peg.142	fig|6666666.374193.peg.148	fig|6666666.374193.peg.45	fig|6666666.374193.peg.168	fig|6666666.374193.peg.153	fig|6666666.374193.peg.90	fig|6666666.374193.peg.8	fig|6666666.374193.peg.49	fig|6666666.374193.peg.79	fig|6666666.374193.peg.172	fig|6666666.374193.peg.54	fig|6666666.374193.peg.123	fig|6666666.374193.peg.117	fig|6666666.374193.peg.133	fig|6666666.374193.peg.80	fig|6666666.374193.peg.63	fig|6666666.374193.peg.161	fig|6666666.374193.peg.53	fig|6666666.374193.peg.78	fig|6666666.374193.peg.154	fig|6666666.374193.peg.118	fig|6666666.374193.peg.108	fig|6666666.374193.peg.84	fig|6666666.374193.peg.83	fig|6666666.374193.peg.171	fig|6666666.374193.peg.21	fig|6666666.374193.peg.23	fig|6666666.374193.peg.74	fig|6666666.374193.peg.32	fig|6666666.374193.peg.24	fig|6666666.374193.peg.17	fig|6666666.374193.peg.46	fig|6666666.374193.peg.22	fig|6666666.374193.peg.29	fig|6666666.374193.peg.2	fig|6666666.374193.peg.73	fig|6666666.374193.peg.69	fig|6666666.374193.peg.33	fig|6666666.374193.peg.26	fig|6666666.374193.peg.60	fig|6666666.374193.peg.59	fig|6666666.374193.peg.99	fig|6666666.374193.peg.11	fig|6666666.374193.peg.31	fig|6666666.374193.peg.149	fig|6666666.374193.peg.58	fig|6666666.374193.peg.30	fig|6666666.374193.peg.39
fig|6666666.374193.peg.173		3	4	10	5	3	4	6	7	8	4	6	4	5	6	4	2	5	6	5	4	1	2	11	7	4	2	4	4	2	5	4	5	2	4	5	5	5	6	6	5	4	6	4	5	6	6	3	5
fig|6666666.374193.peg.142	3		7	2	7	6	6	2	3	3	8	3	9	3	4	1	1	3	4	8	7	10	9	3	4	5	2	1	2	1	6	1	3	2	4	5	4	2	7	3	1	1	3	2	4	5	3	1	2
fig|6666666.374193.peg.148	4	7		4	7	7	6	4	5	4	6	5	5	4	5	2	1	5	3	5	10	4	4	5	6	4	2	1	4	1	6	2	3	1	2	5	6	2	7	5	3	3	2	2	4	4	3	1	2
fig|6666666.374193.peg.45	10	2	4		8	2	5	6	9	7	3	6	5	5	9	3	2	5	4	5	3	3	4	6	8	6	2	2	3	2	5	4	5	3	5	6	9	4	6	4	3	3	4	3	10	6	5	3	5
fig|6666666.374193.peg.168	5	7	7	8		6	7	7	10	8	6	8	8	5	6	3	2	5	7	8	5	3	4	9	8	6	2	2	7	2	5	3	6	3	4	12	6	5	6	5	4	3	5	3	6	6	5	2	4
fig|6666666.374193.peg.153	3	6	7	2	6		7	5	4	5	6	3	7	7	3	2	1	4	4	5	9	3	7	4	4	7	1	1	5	1	9	1	2	1	2	5	3	2	4	7	1	2	3	2	4	3	2	1	1
fig|6666666.374193.peg.90	4	6	6	5	7	7		3	8	5	3	7	8	5	8	4	1	4	3	6	8	5	8	4	5	5	1	1	4	1	4	2	3	1	3	6	7	3	6	3	2	2	5	2	6	4	3	1	1
fig|6666666.374193.peg.8	6	2	4	6	7	5	3		6	5	3	3	3	5	6	4	2	4	5	5	2	3	4	4	6	3	3	3	4	1	3	4	5	2	6	6	4	6	5	5	5	5	5	6	7	6	8	4	4
fig|6666666.374193.peg.49	7	3	5	9	10	4	8	6		9	5	8	5	4	7	4	2	6	5	6	4	2	4	6	5	6	2	3	5	3	8	4	4	3	5	4	6	5	5	6	4	3	7	5	5	6	4	3	4
fig|6666666.374193.peg.79	8	3	4	7	8	5	5	5	9		2	5	2	8	7	4	2	5	3	8	4	3	2	7	6	4	2	2	6	2	8	2	6	3	4	4	4	5	4	8	5	3	5	5	7	5	6	3	5
fig|6666666.374193.peg.172	4	8	6	3	6	6	3	3	5	2		3	3	6	5	2	1	2	5	7	7	5	6	5	5	9	1	1	3	1	6	2	1	1	2	3	4	3	5	2	1	1	2	1	4	2	3	1	2
fig|6666666.374193.peg.54	6	3	5	6	8	3	7	3	8	5	3		8	5	8	4	2	7	6	6	4	3	4	4	6	5	2	3	5	2	6	5	6	2	4	5	6	4	8	8	3	3	5	3	7	7	4	2	4
fig|6666666.374193.peg.123	4	9	5	5	8	7	8	3	5	2	3	8		8	5	2	2	4	9	6	10	6	5	4	5	6	1	1	3	1	8	2	3	1	3	8	8	3	7	4	3	2	5	1	6	3	4	1	2
fig|6666666.374193.peg.117	5	3	4	5	5	7	5	5	4	8	6	5	8		7	3	1	3	8	6	2	3	5	11	10	6	3	1	10	1	7	1	2	1	4	6	4	4	3	6	3	3	3	2	7	5	3	2	2
fig|6666666.374193.peg.133	6	4	5	9	6	3	8	6	7	7	5	8	5	7		4	2	5	7	7	5	2	2	8	9	5	2	2	4	2	7	3	3	2	5	9	6	5	11	6	4	3	4	4	5	8	5	2	2
fig|6666666.374193.peg.80	4	1	2	3	3	2	4	4	4	4	2	4	2	3	4		7	3	3	4	2	1	1	3	3	2	4	4	3	4	2	6	4	5	5	3	4	4	3	2	4	7	7	5	3	6	4	4	5
fig|6666666.374193.peg.63	2	1	1	2	2	1	1	2	2	2	1	2	2	1	2	7		2	1	2	1	1	1	2	2	1	6	6	1	5	1	5	3	6	4	2	2	3	2	3	4	5	4	3	2	4	3	7	4
fig|6666666.374193.peg.161	5	3	5	5	5	4	4	4	6	5	2	7	4	3	5	3	2		6	6	2	3	1	6	5	5	2	2	3	2	5	3	5	1	4	6	4	3	5	5	4	4	3	4	6	5	3	3	4
fig|6666666.374193.peg.53	6	4	3	4	7	4	3	5	5	3	5	6	9	8	7	3	1	6		6	8	7	7	9	4	3	2	2	8	1	5	2	4	2	4	3	6	5	4	3	2	2	4	2	4	3	3	1	2
fig|6666666.374193.peg.78	5	8	5	5	8	5	6	5	6	8	7	6	6	6	7	4	2	6	6		9	7	4	10	5	3	2	2	8	2	9	3	6	3	4	7	8	3	9	5	3	4	6	3	3	7	6	2	4
fig|6666666.374193.peg.154	4	7	10	3	5	9	8	2	4	4	7	4	10	2	5	2	1	2	8	9		5	6	5	5	3	1	1	5	1	3	2	4	2	2	5	7	4	5	4	2	1	3	1	4	7	2	1	2
fig|6666666.374193.peg.118	1	10	4	3	3	3	5	3	2	3	5	3	6	3	2	1	1	3	7	7	5		9	4	3	1	0	1	2	1	6	1	2	1	3	4	4	1	4	3	0	1	2	1	3	1	2	1	1
fig|6666666.374193.peg.108	2	9	4	4	4	7	8	4	4	2	6	4	5	5	2	1	1	1	7	4	6	9		2	2	1	1	0	1	0	3	0	3	1	2	4	3	1	4	2	1	2	3	2	1	1	2	1	1
fig|6666666.374193.peg.84	11	3	5	6	9	4	4	4	6	7	5	4	4	11	8	3	2	6	9	10	5	4	2		17	5	2	2	7	1	4	3	6	2	4	5	9	5	8	7	5	3	4	3	7	5	6	1	4
fig|6666666.374193.peg.83	7	4	6	8	8	4	5	6	5	6	5	6	5	10	9	3	2	5	4	5	5	3	2	17		6	2	3	6	1	5	3	6	2	5	6	5	4	7	6	3	2	4	4	9	6	4	3	4
fig|6666666.374193.peg.171	4	5	4	6	6	7	5	3	6	4	9	5	6	6	5	2	1	5	3	3	3	1	1	5	6		2	2	6	2	5	4	6	2	4	8	7	4	9	7	2	2	5	4	6	4	4	2	4
fig|6666666.374193.peg.21	2	2	2	2	2	1	1	3	2	2	1	2	1	3	2	4	6	2	2	2	1	0	1	2	2	2		11	2	8	1	4	4	8	3	1	2	5	2	2	5	5	3	4	2	2	3	5	4
fig|6666666.374193.peg.23	4	1	1	2	2	1	1	3	3	2	1	3	1	1	2	4	6	2	2	2	1	1	0	2	3	2	11		2	8	1	6	4	8	5	2	2	5	2	1	5	5	3	5	3	4	4	5	5
fig|6666666.374193.peg.74	4	2	4	3	7	5	4	4	5	6	3	5	3	10	4	3	1	3	8	8	5	2	1	7	6	6	2	2		2	10	5	6	2	5	6	10	4	7	5	2	3	4	3	8	5	5	2	3
fig|6666666.374193.peg.32	2	1	1	2	2	1	1	1	3	2	1	2	1	1	2	4	5	2	1	2	1	1	0	1	1	2	8	8	2		2	4	4	8	4	1	3	4	2	2	4	5	3	3	2	4	4	6	4
fig|6666666.374193.peg.24	5	6	6	5	5	9	4	3	8	8	6	6	8	7	7	2	1	5	5	9	3	6	3	4	5	5	1	1	10	2		2	4	2	4	4	8	4	7	7	2	2	3	2	5	5	3	2	1
fig|6666666.374193.peg.17	4	1	2	4	3	1	2	4	4	2	2	5	2	1	3	6	5	3	2	3	2	1	0	3	3	4	4	6	5	4	2		6	6	6	2	5	6	4	5	7	7	6	5	4	6	7	6	6
fig|6666666.374193.peg.46	5	3	3	5	6	2	3	5	4	6	1	6	3	2	3	4	3	5	4	6	4	2	3	6	6	6	4	4	6	4	4	6		3	10	5	9	6	4	5	4	5	5	5	4	7	4	4	5
fig|6666666.374193.peg.22	2	2	1	3	3	1	1	2	3	3	1	2	1	1	2	5	6	1	2	3	2	1	1	2	2	2	8	8	2	8	2	6	3		5	2	3	4	3	2	5	6	4	4	2	4	5	7	4
fig|6666666.374193.peg.29	4	4	2	5	4	2	3	6	5	4	2	4	3	4	5	5	4	4	4	4	2	3	2	4	5	4	3	5	5	4	4	6	10	5		5	6	8	5	6	6	6	8	9	5	7	6	4	7
fig|6666666.374193.peg.2	5	5	5	6	12	5	6	6	4	4	3	5	8	6	9	3	2	6	3	7	5	4	4	5	6	8	1	2	6	1	4	2	5	2	5		8	3	9	6	2	4	6	4	10	5	4	2	3
fig|6666666.374193.peg.73	5	4	6	9	6	3	7	4	6	4	4	6	8	4	6	4	2	4	6	8	7	4	3	9	5	7	2	2	10	3	8	5	9	3	6	8		6	12	8	5	4	3	4	6	6	7	3	4
fig|6666666.374193.peg.69	5	2	2	4	5	2	3	6	5	5	3	4	3	4	5	4	3	3	5	3	4	1	1	5	4	4	5	5	4	4	4	6	6	4	8	3	6		5	6	5	6	6	8	3	7	7	4	6
fig|6666666.374193.peg.33	6	7	7	6	6	4	6	5	5	4	5	8	7	3	11	3	2	5	4	9	5	4	4	8	7	9	2	2	7	2	7	4	4	3	5	9	12	5		7	4	3	5	3	9	8	4	2	4
fig|6666666.374193.peg.26	6	3	5	4	5	7	3	5	6	8	2	8	4	6	6	2	3	5	3	5	4	3	2	7	6	7	2	1	5	2	7	5	5	2	6	6	8	6	7		3	6	6	6	5	4	5	3	4
fig|6666666.374193.peg.60	5	1	3	3	4	1	2	5	4	5	1	3	3	3	4	4	4	4	2	3	2	0	1	5	3	2	5	5	2	4	2	7	4	5	6	2	5	5	4	3		22	5	5	4	5	7	6	5
fig|6666666.374193.peg.59	4	1	3	3	3	2	2	5	3	3	1	3	2	3	3	7	5	4	2	4	1	1	2	3	2	2	5	5	3	5	2	7	5	6	6	4	4	6	3	6	22		6	5	3	5	5	6	4
fig|6666666.374193.peg.99	6	3	2	4	5	3	5	5	7	5	2	5	5	3	4	7	4	3	4	6	3	2	3	4	4	5	3	3	4	3	3	6	5	4	8	6	3	6	5	6	5	6		6	4	6	8	4	4
fig|6666666.374193.peg.11	4	2	2	3	3	2	2	6	5	5	1	3	1	2	4	5	3	4	2	3	1	1	2	3	4	4	4	5	3	3	2	5	5	4	9	4	4	8	3	6	5	5	6		2	4	4	5	5
fig|6666666.374193.peg.31	5	4	4	10	6	4	6	7	5	7	4	7	6	7	5	3	2	6	4	3	4	3	1	7	9	6	2	3	8	2	5	4	4	2	5	10	6	3	9	5	4	3	4	2		7	6	3	4
fig|6666666.374193.peg.149	6	5	4	6	6	3	4	6	6	5	2	7	3	5	8	6	4	5	3	7	7	1	1	5	6	4	2	4	5	4	5	6	7	4	7	5	6	7	8	4	5	5	6	4	7		5	4	5
fig|6666666.374193.peg.58	6	3	3	5	5	2	3	8	4	6	3	4	4	3	5	4	3	3	3	6	2	2	2	6	4	4	3	4	5	4	3	7	4	5	6	4	7	7	4	5	7	5	8	4	6	5		13	7
fig|6666666.374193.peg.30	3	1	1	3	2	1	1	4	3	3	1	2	1	2	2	4	7	3	1	2	1	1	1	1	3	2	5	5	2	6	2	6	4	7	4	2	3	4	2	3	6	6	4	5	3	4	13		5
fig|6666666.374193.peg.39	5	2	2	5	4	1	1	4	4	5	2	4	2	2	2	5	4	4	2	4	2	1	1	4	4	4	4	5	3	4	1	6	5	4	7	3	4	6	4	4	5	4	4	5	4	5	7	5
fig|6666666.374193.peg.6	3	8	7	4	6	8	6	1	3	4	7	4	8	3	4	1	1	5	3	7	8	8	10	5	7	7	1	1	5	1	5	2	5	1	2	8	4	1	5	1	2	2	2	2	4	2	2	1	2
fig|6666666.374193.peg.126	6	5	6	6	7	7	7	5	7	6	5	5	4	10	7	2	2	6	6	5	12	3	4	8	8	5	1	1	4	2	6	3	5	2	4	5	6	3	7	5	4	3	4	4	6	5	4	2	3
fig|6666666.374193.peg.89	4	5	6	7	7	6	8	6	9	7	4	7	5	8	7	3	2	7	2	8	9	5	3	8	7	9	2	2	8	2	9	3	4	2	3	8	9	3	7	6	4	3	6	3	7	6	5	2	3
fig|6666666.374193.peg.10	5	2	5	8	8	6	6	8	11	6	2	6	6	7	7	4	2	4	4	7	4	2	3	7	5	6	1	2	5	2	6	3	5	2	3	8	13	4	7	7	3	3	5	4	5	7	5	2	3
fig|6666666.374193.peg.9	3	2	7	5	6	4	4	7	8	6	2	4	3	5	4	4	1	3	4	6	3	4	3	4	5	3	2	2	3	1	5	2	4	1	3	5	5	3	4	2	4	2	5	3	6	5	4	2	3
fig|6666666.374193.peg.159	1	4	6	3	4	8	4	2	2	3	4	2	9	6	5	2	1	2	3	4	4	6	7	4	2	3	1	1	3	1	3	1	1	1	2	9	3	1	4	5	1	1	3	1	2	2	3	1	1
fig|6666666.374193.peg.47	4	8	7	5	8	9	8	4	6	7	3	5	5	4	8	3	2	4	4	5	4	4	6	4	5	6	1	1	6	2	10	2	4	1	3	8	5	4	5	6	2	2	3	3	4	5	3	1	4
fig|6666666.374193.peg.48	7	4	3	6	7	7	8	5	7	4	4	5	8	7	11	4	1	4	10	6	7	4	5	7	5	4	1	1	7	2	7	3	4	2	4	11	7	3	9	6	2	3	5	3	7	6	5	1	3
fig|6666666.374193.peg.20	4	4	5	5	10	5	9	5	7	5	3	10	10	4	10	4	2	3	4	9	3	3	3	5	7	4	2	3	2	1	7	4	5	2	5	8	6	2	8	5	3	2	5	3	8	5	3	1	2
fig|6666666.374193.peg.4	5	4	3	7	4	4	3	5	6	6	4	6	4	4	6	5	2	4	3	6	3	2	1	6	7	5	2	3	4	2	4	4	6	3	6	4	6	5	5	5	4	4	6	4	6	9	5	2	4
fig|6666666.374193.peg.166	6	5	4	8	6	4	9	5	11	5	7	5	5	6	10	3	2	6	6	6	6	8	1	7	6	9	1	3	6	2	9	4	4	2	6	7	9	6	8	4	3	3	6	2	6	5	3	2	3
fig|6666666.374193.peg.104	6	3	3	12	11	5	5	7	9	7	6	7	5	6	7	5	2	5	5	7	5	3	2	8	4	9	2	2	5	3	5	4	5	3	7	10	6	6	7	9	3	4	6	4	5	6	4	3	4
fig|6666666.374193.peg.102	4	5	5	4	4	5	9	4	3	5	5	5	4	7	8	3	1	6	2	8	7	3	4	5	7	6	2	1	12	2	8	3	4	2	4	6	9	4	9	5	2	2	4	3	6	5	4	1	2
fig|6666666.374193.peg.81	5	3	3	4	4	2	2	6	6	4	2	5	3	4	4	5	4	5	3	5	2	2	2	5	6	4	3	3	2	3	3	4	6	4	9	4	4	4	4	5	7	6	5	5	6	7	7	5	6
fig|6666666.374193.peg.93	6	6	9	5	7	8	8	4	8	5	7	7	7	7	11	3	2	6	7	6	5	6	4	6	6	13	2	1	7	2	5	2	6	1	3	12	7	4	11	7	3	4	4	3	4	5	4	2	3
fig|6666666.374193.peg.19	6	5	6	7	11	3	6	7	11	5	5	8	8	5	8	3	2	5	7	7	5	3	5	5	9	5	1	2	7	1	5	3	5	2	5	6	11	5	11	6	3	2	5	5	6	5	3	3	4
fig|6666666.374193.peg.14	6	3	2	5	7	3	5	6	6	9	5	4	9	7	4	4	2	7	4	5	5	4	2	7	9	6	2	3	9	2	6	4	6	4	5	8	8	4	5	7	4	4	5	4	9	4	5	2	4
fig|6666666.374193.peg.67	7	3	5	5	8	7	4	6	5	7	2	6	7	6	6	3	3	5	6	6	9	3	5	8	7	6	2	2	4	2	4	2	7	2	4	6	5	4	7	7	4	3	6	5	5	5	4	1	4
fig|6666666.374193.peg.28	4	5	6	4	9	7	5	8	9	8	5	5	6	4	10	4	3	5	4	6	4	2	3	8	7	7	2	2	6	2	5	3	5	2	4	7	7	7	6	7	4	4	5	4	7	8	7	3	4
fig|6666666.374193.peg.138	3	6	7	5	5	6	5	5	3	3	7	5	6	6	6	1	1	2	5	4	7	5	2	4	4	6	1	1	6	1	5	2	4	1	3	4	5	4	5	3	2	1	2	1	7	4	2	1	1
fig|6666666.374193.peg.135	6	5	6	7	9	7	3	7	7	6	6	7	5	7	7	4	1	5	7	5	5	3	3	9	6	8	2	2	6	2	10	3	4	3	4	8	7	6	12	9	2	2	5	4	6	5	5	1	3
fig|6666666.374193.peg.132	4	7	6	3	5	10	5	5	4	6	3	4	6	5	4	3	1	4	3	7	5	3	2	4	5	6	1	1	4	1	5	2	3	2	4	5	5	3	3	4	3	2	4	3	3	6	3	1	2
fig|6666666.374193.peg.42	5	1	2	3	4	2	2	4	5	4	2	3	2	2	4	6	5	3	3	3	1	1	1	4	3	3	4	3	3	3	3	5	3	5	5	3	2	4	2	4	5	6	6	5	3	4	5	5	5
fig|6666666.374193.peg.70	5	3	3	5	6	3	3	5	7	5	2	6	4	4	4	5	5	4	6	3	2	1	1	3	4	3	3	3	3	4	3	3	6	5	6	5	5	7	4	3	5	5	5	7	4	6	4	3	6
fig|6666666.374193.peg.88	3	2	2	3	2	1	2	3	4	4	1	3	2	2	3	5	7	3	1	3	2	1	1	3	3	2	4	5	1	5	2	5	3	5	5	2	3	5	3	3	4	4	4	5	2	4	5	5	6
fig|6666666.374193.peg.86	4	3	4	7	7	5	7	5	9	5	3	7	7	6	8	4	2	3	6	7	6	4	6	6	7	8	1	2	9	1	6	3	6	2	3	11	8	4	8	8	2	3	5	4	7	5	4	2	3
fig|6666666.374193.peg.85	7	6	4	4	6	4	4	5	5	8	5	6	6	6	7	4	2	5	9	7	5	5	5	7	6	5	2	2	5	2	7	3	6	3	4	5	5	5	5	8	4	3	6	4	7	5	5	2	3
fig|6666666.374193.peg.82	7	4	6	8	9	5	7	5	7	5	6	8	4	8	5	3	2	4	2	8	4	2	4	6	7	5	2	2	5	1	7	4	6	2	4	7	9	5	7	7	3	4	4	4	8	6	5	2	4
fig|6666666.374193.peg.170	5	6	6	4	7	3	7	5	6	7	3	8	5	6	5	3	2	6	4	9	3	4	2	10	8	7	3	2	7	2	7	5	6	2	5	5	11	5	6	6	3	3	8	4	5	8	6	2	4
fig|6666666.374193.peg.98	6	3	4	6	6	3	5	6	8	6	2	5	6	5	9	5	3	6	4	5	4	2	1	5	5	8	2	2	4	2	4	5	5	3	4	5	6	5	7	8	5	6	6	3	6	4	4	3	5
fig|6666666.374193.peg.162	3	3	7	6	10	10	13	4	8	4	4	7	5	5	5	2	2	4	6	9	6	11	7	7	4	6	2	2	7	1	8	3	4	2	4	8	6	2	7	5	1	2	4	1	5	4	2	2	2
fig|6666666.374193.peg.140	4	6	6	6	3	8	10	4	5	3	8	4	9	11	4	3	1	2	5	6	10	9	9	6	6	7	1	1	4	1	9	2	3	1	4	6	5	3	6	2	3	2	3	1	6	4	4	2	2
fig|6666666.374193.peg.64	3	4	7	3	5	10	12	3	6	4	7	4	7	7	4	2	1	2	4	5	5	1	6	6	7	4	1	1	2	0	4	1	3	1	2	4	6	1	4	5	3	1	2	2	3	2	3	1	1
fig|6666666.374193.peg.106	4	7	8	7	3	7	5	4	6	5	9	3	8	6	3	1	1	2	3	5	7	9	3	8	9	5	1	1	4	2	7	2	3	1	4	6	5	4	6	5	3	3	3	2	5	4	4	2	4
fig|6666666.374193.peg.116	6	5	9	7	8	9	11	5	7	4	3	5	7	5	6	3	1	4	6	6	6	8	5	7	5	6	1	1	7	2	6	2	4	1	4	10	9	3	8	5	3	1	5	3	5	4	4	1	2
fig|6666666.374193.peg.115	5	5	8	4	7	7	9	2	4	6	4	4	7	6	6	3	2	5	4	7	7	4	4	5	7	5	1	1	4	1	11	2	5	2	3	8	9	3	7	6	2	2	4	3	6	4	3	2	1
fig|6666666.374193.peg.87	5	6	5	6	6	7	6	6	7	5	6	5	7	6	7	4	2	8	5	9	7	3	4	8	9	6	2	2	7	1	7	3	4	1	5	11	9	4	8	5	4	3	4	4	8	5	2	2	4
fig|6666666.374193.peg.91	3	9	6	5	6	5	9	3	3	4	2	5	8	4	3	3	1	4	4	5	6	4	5	5	4	3	1	1	4	1	7	2	5	1	2	4	6	3	7	4	3	2	3	2	6	4	3	1	2
fig|6666666.374193.peg.155	5	8	7	7	11	11	9	4	7	6	4	6	6	7	5	2	2	5	5	10	8	4	4	9	11	10	1	2	8	1	9	2	5	1	3	11	9	3	9	6	3	2	4	3	10	8	3	2	3
fig|6666666.374193.peg.152	4	6	6	4	5	7	8	4	4	5	5	5	11	5	5	3	1	3	4	4	9	4	8	4	6	2	1	1	2	1	6	1	4	1	3	8	6	3	8	6	2	1	5	2	5	4	3	1	2
fig|6666666.374193.peg.134	6	7	9	6	9	5	6	6	5	7	6	8	10	4	7	3	2	6	4	4	7	5	5	6	8	6	1	2	5	2	5	2	5	2	5	13	6	4	8	5	5	2	3	2	7	4	4	2	4
fig|6666666.374193.peg.129	6	8	9	4	7	5	7	3	6	7	3	6	8	5	7	3	2	6	4	5	5	6	4	3	9	4	1	1	4	1	7	2	6	1	3	6	6	2	8	6	4	2	2	3	7	4	3	2	3
fig|6666666.374193.peg.139	5	9	8	5	5	5	9	4	5	5	6	5	5	5	8	2	1	4	6	7	9	5	10	3	3	7	1	2	3	1	7	2	2	2	3	8	6	3	8	3	2	2	4	3	4	5	3	2	2
fig|6666666.374193.peg.95	3	5	9	4	5	8	7	3	5	4	2	4	7	7	6	2	1	4	6	5	4	4	4	7	7	6	1	1	4	1	6	2	5	1	4	8	8	3	7	4	3	2	3	3	4	6	4	1	2
fig|6666666.374193.peg.125	6	6	4	6	7	8	10	5	3	5	4	6	6	7	4	1	1	5	6	5	3	6	2	7	4	4	1	1	3	1	2	3	4	1	2	6	3	2	7	7	2	2	4	2	4	2	2	1	2
fig|6666666.374193.peg.65	6	5	5	4	8	9	6	4	9	6	4	5	6	5	7	2	1	5	7	6	4	4	5	5	7	5	1	1	4	1	13	2	4	2	3	6	7	5	9	6	4	3	5	2	5	3	7	2	1
fig|6666666.374193.peg.1	4	7	7	6	6	6	10	6	6	5	7	7	7	8	6	4	2	3	5	8	5	4	4	4	6	5	1	2	3	1	10	2	5	2	3	7	7	3	9	7	3	3	5	3	8	4	3	1	3
fig|6666666.374193.peg.165	6	5	6	8	9	6	4	10	8	10	6	6	6	6	10	3	2	5	6	8	8	4	4	7	7	7	2	3	7	2	6	3	6	2	6	9	6	6	7	8	3	3	3	4	8	7	5	2	3
fig|6666666.374193.peg.103	6	4	5	7	6	4	8	8	6	6	4	7	5	8	8	3	2	6	10	9	7	5	5	7	8	5	2	1	5	1	5	3	6	1	5	7	10	3	10	4	3	3	4	3	5	7	4	2	3
fig|6666666.374193.peg.56	4	6	6	6	7	7	6	7	8	5	4	6	5	7	4	3	3	5	3	7	3	4	5	8	8	5	2	2	5	1	5	4	6	2	6	8	7	6	5	6	4	3	5	4	6	7	4	1	4
fig|6666666.374193.peg.158	4	4	7	4	5	7	6	5	5	7	4	5	4	5	5	2	2	2	3	6	10	4	1	4	7	6	1	1	6	1	8	3	4	2	4	12	6	3	8	3	3	2	3	3	7	4	3	2	1
fig|6666666.374193.peg.105	5	4	4	5	3	5	5	6	5	6	2	8	6	5	8	4	2	3	7	6	2	3	4	5	6	4	2	2	4	2	6	3	6	2	5	6	5	5	5	6	4	5	9	4	6	6	7	3	4
fig|6666666.374193.peg.62	5	6	6	4	4	5	10	2	7	2	3	7	8	5	5	3	1	4	4	5	6	9	9	7	6	4	1	2	4	1	6	2	2	2	4	8	6	2	4	7	3	2	5	2	4	3	3	1	2
fig|6666666.374193.peg.160	3	3	3	2	2	7	3	2	2	2	5	3	3	2	3	1	1	1	2	2	8	3	3	1	2	1	0	0	5	0	3	1	1	1	2	3	2	1	3	1	1	1	1	1	2	0	1	1	1
fig|6666666.374193.peg.110	3	3	7	5	6	4	13	3	4	4	5	5	5	6	6	2	1	2	4	6	5	3	4	3	4	5	1	1	4	1	9	2	5	1	4	7	7	3	5	2	1	2	3	1	5	5	3	1	2
fig|6666666.374193.peg.151	5	4	5	7	7	4	9	4	5	4	7	6	8	4	5	2	2	4	3	8	2	7	7	6	6	12	1	1	6	1	8	3	5	1	3	5	7	3	7	7	3	2	3	2	5	4	5	1	3
fig|6666666.374193.peg.66	7	7	6	5	7	7	4	5	4	6	4	6	5	10	7	3	2	6	8	7	6	4	4	5	6	5	1	2	6	2	5	3	6	2	5	5	8	5	7	7	4	3	3	4	8	7	6	2	5
fig|6666666.374193.peg.121	5	6	6	4	6	10	6	4	9	3	9	4	11	10	3	2	1	3	4	7	6	6	3	3	5	5	1	2	8	2	10	2	3	1	4	6	7	3	7	6	4	2	4	2	4	6	3	1	2
fig|6666666.374193.peg.111	5	6	5	7	11	10	13	7	5	6	3	5	7	9	9	3	1	5	5	9	3	3	6	8	8	5	1	1	3	1	12	2	4	2	3	8	8	4	12	5	2	2	5	4	7	6	3	2	2
fig|6666666.374193.peg.144	4	6	4	5	4	7	7	3	8	5	7	4	5	5	7	2	1	4	3	7	4	5	4	5	4	6	1	2	7	2	10	2	2	1	2	6	7	4	8	4	2	2	5	3	4	6	5	2	2
fig|6666666.374193.peg.35	6	5	5	5	5	6	8	8	6	7	3	5	5	6	7	4	2	4	4	9	4	3	5	6	6	7	2	1	9	2	10	3	8	3	5	7	11	6	8	8	4	4	4	5	7	7	2	3	3
fig|6666666.374193.peg.163	6	6	5	7	6	6	4	5	5	7	4	7	5	5	5	4	2	7	8	9	7	5	3	7	7	7	2	1	6	1	8	2	4	2	5	6	5	6	9	5	3	3	5	2	7	4	4	2	4
fig|6666666.374193.peg.101	5	6	4	4	8	4	6	4	4	5	3	8	6	7	6	2	1	5	5	5	3	4	3	7	4	7	1	2	10	3	7	3	5	2	4	7	6	4	8	8	4	3	4	2	5	4	4	1	3
fig|6666666.374193.peg.52	8	5	6	5	11	9	6	6	9	7	5	6	3	8	8	3	2	4	7	7	4	3	5	7	7	5	2	2	6	1	8	2	4	2	5	4	5	4	6	5	4	3	5	3	5	6	4	2	3
fig|6666666.374193.peg.167	5	7	6	6	7	9	7	4	6	3	4	5	8	3	5	3	1	5	3	5	10	5	5	5	3	5	1	2	5	1	8	2	4	1	3	7	4	3	5	3	2	1	4	2	6	5	2	1	2
fig|6666666.374193.peg.41	3	5	4	2	4	7	11	4	1	2	4	3	7	5	3	1	1	2	4	3	2	4	1	4	4	3	1	1	3	0	7	2	4	1	2	6	3	1	3	3	1	2	3	1	6	3	2	1	1
fig|6666666.374193.peg.157	5	5	7	6	7	4	9	4	9	8	3	5	5	8	7	3	2	4	5	5	5	6	4	6	7	4	1	2	7	2	3	4	4	2	4	5	8	4	10	6	4	3	5	4	6	4	3	2	3
fig|6666666.374193.peg.71	3	6	5	5	3	5	9	2	3	6	6	3	4	5	5	3	1	4	3	3	4	4	5	5	6	2	1	1	4	1	5	1	3	1	2	9	8	3	8	4	4	2	2	2	5	5	4	2	3
fig|6666666.374193.peg.146	4	3	6	4	8	8	8	5	5	7	3	4	7	9	6	2	2	3	6	5	6	4	3	6	6	3	2	2	8	1	5	2	3	1	2	10	6	2	3	6	2	2	4	2	6	5	4	1	2
fig|6666666.374193.peg.7	6	1	3	4	2	2	3	5	4	4	3	4	2	2	3	6	4	3	2	5	2	2	2	3	5	2	3	4	3	3	2	5	4	4	6	3	2	6	3	4	6	6	6	5	3	3	6	4	5
fig|6666666.374193.peg.150	5	4	10	6	5	8	4	5	4	5	4	3	5	6	3	2	1	5	6	3	13	5	3	5	9	5	1	1	5	1	4	2	1	1	3	5	5	2	4	5	2	1	3	2	8	3	2	2	3
fig|6666666.374193.peg.3	4	5	7	5	3	7	7	5	4	4	7	3	7	5	4	2	1	2	4	5	7	10	8	4	3	4	2	1	5	1	6	2	3	1	3	5	7	4	6	2	3	3	2	3	6	4	3	2	2
fig|6666666.374193.peg.136	6	6	5	5	5	6	9	3	4	4	3	6	7	8	5	2	1	2	7	3	5	9	9	2	5	3	1	1	5	1	5	2	3	2	3	5	6	4	4	3	1	2	3	2	5	4	2	2	2
fig|6666666.374193.peg.137	3	4	6	3	5	5	9	3	7	4	3	5	9	7	3	1	2	2	3	5	4	4	7	3	4	3	1	1	6	1	8	2	5	1	4	8	7	2	5	6	1	2	4	2	6	2	3	2	2
fig|6666666.374193.peg.127	3	6	7	4	3	6	9	1	4	4	5	4	6	4	4	1	1	2	4	5	10	9	8	4	3	4	1	1	3	1	9	2	2	1	3	3	4	2	5	2	1	1	2	1	4	3	2	1	1
fig|6666666.374193.peg.122	2	10	9	5	6	7	8	3	6	4	10	5	8	7	5	2	1	4	4	6	10	4	6	5	5	4	1	1	5	1	9	2	2	1	2	5	6	2	6	6	2	1	3	3	4	5	3	1	1
fig|6666666.374193.peg.164	4	4	5	6	5	5	4	8	5	5	4	6	4	5	8	5	3	7	5	4	4	3	2	9	5	4	1	2	5	2	5	4	4	3	6	6	9	3	8	7	5	4	6	4	7	5	6	3	4
fig|6666666.374193.peg.61	6	5	6	7	9	1	10	5	8	5	4	6	5	4	9	4	2	3	7	9	4	4	3	7	8	7	2	2	5	2	6	5	7	3	6	6	8	5	8	4	4	3	5	4	6	7	5	2	4
fig|6666666.374193.peg.113	5	6	10	6	5	6	12	4	6	3	7	5	6	6	6	3	1	4	5	7	8	7	8	3	7	3	1	1	6	1	9	2	3	1	3	6	9	2	6	3	2	1	3	1	5	5	3	1	3
fig|6666666.374193.peg.12	6	3	4	8	5	4	4	5	10	5	3	4	4	3	4	4	3	7	4	6	4	2	2	6	5	3	2	4	4	2	3	6	6	2	6	6	7	5	6	4	3	3	8	5	8	9	8	3	5
fig|6666666.374193.peg.96	7	3	3	6	4	1	4	4	3	4	1	7	3	3	5	5	5	4	3	6	4	3	2	4	4	2	3	4	4	2	3	5	5	4	5	5	5	5	5	5	3	4	7	3	7	5	5	3	5
fig|6666666.374193.peg.156	3	2	3	3	2	1	3	4	2	3	1	4	2	2	3	5	5	4	1	3	2	1	2	3	3	3	3	4	1	4	3	5	6	5	5	2	4	5	4	3	7	7	6	5	3	5	4	5	5
fig|6666666.374193.peg.119	6	5	8	4	6	11	8	4	5	7	7	4	5	6	6	3	1	1	2	5	5	1	4	6	7	4	1	1	7	1	6	2	4	1	2	3	4	2	9	6	2	2	2	3	6	3	3	1	3
fig|6666666.374193.peg.76	5	2	2	6	3	2	3	5	4	4	1	3	3	3	2	5	4	4	3	3	2	1	2	4	2	3	5	5	2	4	2	6	4	5	5	4	5	6	3	4	6	6	6	5	4	6	6	4	7
fig|6666666.374193.peg.27	4	5	6	6	12	9	6	4	7	7	4	8	9	10	7	2	2	6	5	8	5	4	2	9	6	7	2	2	5	1	7	4	6	2	4	7	9	4	8	6	6	4	5	5	6	4	5	1	3
fig|6666666.374193.peg.145	4	5	5	6	5	5	9	4	5	7	6	5	8	3	7	3	2	3	6	5	8	4	4	5	4	6	1	2	4	2	5	2	6	2	3	8	6	4	6	6	4	4	4	4	4	4	5	2	2
fig|6666666.374193.peg.143	3	6	6	2	4	6	9	2	4	3	2	4	7	4	4	2	1	1	4	4	7	4	1	4	3	6	1	0	2	1	6	1	3	1	2	5	5	1	5	4	1	2	1	2	3	2	1	1	1
fig|6666666.374193.peg.131	3	3	5	2	4	5	6	2	4	2	3	3	5	5	3	2	1	2	4	3	6	4	2	3	2	4	1	0	3	1	6	1	3	1	1	6	2	1	5	5	1	1	2	2	3	2	1	1	1
fig|6666666.374193.peg.68	6	4	8	7	6	7	9	4	10	4	4	7	4	3	8	4	2	6	5	8	4	2	3	9	7	4	1	3	5	2	9	3	3	2	3	7	8	5	8	4	3	2	5	3	8	7	5	2	4
fig|6666666.374193.peg.141	4	5	6	8	8	5	9	4	8	4	2	5	4	7	6	2	1	6	5	7	8	7	8	6	5	2	2	2	5	2	3	1	4	2	5	7	8	4	9	4	3	2	3	3	5	3	3	2	3
fig|6666666.374193.peg.114	3	4	5	4	3	3	4	2	3	3	3	3	3	2	2	1	1	1	2	5	3	9	3	4	2	2	0	1	4	1	3	1	3	1	1	4	3	1	3	4	1	1	2	2	4	2	2	1	2
fig|6666666.374193.peg.34	7	2	2	3	5	1	3	4	5	4	3	3	3	3	3	6	4	5	3	4	2	2	2	4	3	3	4	3	4	3	3	5	7	4	7	3	4	6	2	6	5	5	7	6	4	7	6	4	6
fig|6666666.374193.peg.5	6	2	2	6	6	3	2	4	5	6	1	5	4	3	3	7	4	5	3	3	2	1	2	3	3	4	3	4	2	4	3	5	6	4	5	4	3	4	4	4	5	5	5	3	5	7	5	4	6
fig|6666666.374193.peg.130	5	8	8	4	7	8	5	5	6	4	10	5	4	5	4	2	1	5	8	6	10	5	5	3	4	7	1	1	5	1	5	2	3	1	3	5	6	3	6	4	3	2	3	1	4	5	2	2	3
fig|6666666.374193.peg.109	4	6	3	3	3	7	7	2	1	4	4	3	7	4	2	2	1	1	6	2	8	9	5	4	4	1	0	1	5	1	2	1	3	1	2	3	4	2	5	3	1	2	2	1	2	3	3	0	1
fig|6666666.374193.peg.37	7	4	3	4	6	4	4	7	7	6	2	5	5	4	7	3	3	6	8	7	5	1	1	7	4	5	2	3	5	2	5	5	5	2	5	5	8	5	5	8	4	3	5	5	4	4	4	3	4
fig|6666666.374193.peg.15	6	3	2	7	5	4	5	6	7	6	3	6	4	3	4	4	4	3	6	4	3	2	2	7	4	5	2	4	5	2	4	4	7	4	7	6	9	7	6	7	6	5	7	6	7	7	6	4	5
fig|6666666.374193.peg.77	7	8	5	6	10	3	10	3	7	8	8	8	8	2	8	3	2	5	5	10	9	6	2	7	6	8	1	2	6	1	10	3	6	2	4	9	7	3	11	4	3	2	4	3	6	6	2	2	3
fig|6666666.374193.peg.169	4	3	2	6	4	3	3	4	5	4	1	4	3	5	5	5	4	4	3	3	3	1	2	5	6	2	3	3	2	3	4	3	5	3	5	5	4	4	3	4	5	5	5	6	2	4	4	4	2
fig|6666666.374193.peg.100	5	3	4	5	4	2	4	5	5	6	1	5	3	5	5	4	3	3	3	4	4	2	2	6	5	2	3	3	3	2	3	4	6	3	6	3	4	5	3	3	4	3	6	4	5	5	4	4	4
fig|6666666.374193.peg.94	5	3	4	5	4	3	4	5	5	6	2	5	3	5	4	5	3	5	3	4	4	2	2	6	6	2	4	3	3	2	4	4	5	3	4	3	4	4	3	4	4	4	6	4	5	5	4	3	4
fig|6666666.374193.peg.55	2	3	10	4	8	7	9	4	5	3	3	5	5	6	5	2	1	2	2	4	3	3	3	6	6	3	1	1	4	1	6	1	2	1	2	3	4	2	7	6	3	1	2	1	5	5	2	1	1
fig|6666666.374193.peg.36	5	2	4	5	5	3	3	6	4	4	1	7	5	5	4	4	3	3	3	5	3	2	3	4	4	3	4	4	4	3	3	5	6	4	4	5	4	6	4	4	5	5	6	5	5	7	8	3	4
fig|6666666.374193.peg.38	6	3	3	7	6	2	3	4	5	5	3	5	3	5	5	6	2	4	4	6	3	2	3	5	5	3	3	5	5	2	5	4	5	5	6	4	3	6	5	2	5	7	7	5	5	6	6	4	6
fig|6666666.374193.peg.147	6	1	2	6	6	4	7	4	11	6	1	6	3	3	5	3	3	5	1	5	2	2	1	3	5	4	2	3	4	2	6	5	6	2	7	4	7	5	6	7	3	4	5	5	5	6	7	4	5
fig|6666666.374193.peg.13	6	3	4	7	6	3	3	8	6	7	2	3	2	4	5	5	2	4	4	6	3	3	2	4	7	3	2	3	3	3	5	4	4	3	5	4	4	6	4	4	4	4	6	6	4	7	6	3	4
fig|6666666.374193.peg.75	6	3	4	6	6	3	5	6	7	6	2	6	4	2	7	6	3	4	4	6	3	3	2	5	5	3	3	4	5	2	3	5	7	3	6	4	6	5	5	7	4	4	5	5	7	9	6	3	4
fig|6666666.374193.peg.50	6	4	4	6	6	4	4	5	3	7	1	5	4	2	7	4	3	5	3	6	3	2	2	6	5	5	3	3	3	3	4	6	5	3	6	7	6	6	7	4	5	5	5	6	7	6	6	4	4
fig|6666666.374193.peg.107	6	5	5	4	7	5	8	5	6	4	4	6	3	5	9	3	2	6	5	8	3	3	3	5	5	5	2	3	8	2	5	4	7	2	6	8	5	5	7	5	3	5	5	4	5	6	5	3	4
fig|6666666.374193.peg.72	6	2	3	6	9	4	4	7	7	6	4	7	5	3	7	3	2	4	4	8	3	1	4	8	5	4	2	3	6	2	5	3	6	2	5	5	7	6	7	6	4	4	5	5	8	4	6	3	4
fig|6666666.374193.peg.51	6	2	2	5	4	2	4	5	5	6	1	5	5	4	4	5	3	4	3	6	3	1	1	5	3	4	3	3	3	3	5	5	6	4	8	4	5	6	4	2	5	5	6	6	4	4	7	3	6
fig|6666666.374193.peg.40	9	1	2	6	6	4	3	8	6	4	2	5	3	2	6	5	3	2	3	3	3	1	2	7	6	4	3	3	3	2	3	4	6	3	7	4	3	7	6	5	5	5	5	7	4	9	7	2	5
fig|6666666.374193.peg.44	4	3	4	4	4	3	4	5	5	6	3	4	4	3	4	6	3	6	4	6	3	1	3	5	4	4	2	4	3	2	2	5	6	4	7	5	4	5	5	4	5	7	7	4	5	7	6	3	5
fig|6666666.374193.peg.128	7	4	4	9	7	4	6	7	7	7	3	7	5	7	8	5	2	7	7	5	3	3	2	6	11	5	2	3	4	3	5	4	8	4	5	8	9	4	6	6	7	4	5	6	7	5	6	3	5
fig|6666666.374193.peg.97	8	4	5	8	8	4	5	6	10	10	2	4	4	4	6	5	3	7	5	8	5	0	2	6	8	5	2	2	3	2	6	4	6	2	4	9	6	5	7	5	4	2	10	5	7	6	3	2	3
fig|6666666.374193.peg.43	7	4	7	6	6	4	3	5	9	8	3	8	5	5	8	4	3	7	5	6	3	1	1	7	5	6	1	2	3	1	5	3	4	2	4	6	6	4	6	6	5	3	5	4	6	6	6	2	4
fig|6666666.374193.peg.124	7	5	6	6	4	4	8	4	5	5	3	6	6	9	6	2	1	3	8	7	7	8	5	7	7	3	1	2	8	1	4	1	4	1	2	7	7	3	4	5	2	2	3	2	5	5	4	1	2
fig|6666666.374193.peg.57	6	4	8	6	4	5	10	3	7	6	4	5	5	4	7	3	1	4	5	6	10	6	4	6	5	6	1	1	4	1	7	2	1	1	3	3	8	4	7	2	2	2	3	2	2	6	4	1	2
fig|6666666.374193.peg.16	4	6	4	6	10	8	7	4	8	5	9	3	6	8	6	2	1	1	7	8	3	4	10	5	5	6	1	1	6	1	9	1	4	1	2	8	3	3	8	6	3	2	4	3	6	4	3	1	2
fig|6666666.374193.peg.25	6	5	7	6	6	7	8	7	7	5	3	7	8	5	8	3	2	4	6	9	8	5	5	7	7	10	1	2	5	1	6	4	4	2	4	6	8	4	10	6	3	2	7	3	7	6	5	2	2
fig|6666666.374193.peg.18	5	3	7	10	7	5	4	5	7	7	5	4	4	8	5	3	1	6	7	6	6	6	2	4	9	5	1	3	6	1	3	2	4	2	4	6	3	3	7	8	3	2	4	1	6	6	5	2	3
fig|6666666.374193.peg.120	5	7	7	4	7	10	7	4	8	4	9	5	6	6	5	1	2	3	5	6	6	4	4	8	7	6	1	1	5	1	6	2	4	1	3	6	6	2	6	4	2	2	3	3	4	5	4	1	2
fig|6666666.374193.peg.112	5	10	6	4	6	5	6	4	3	3	8	2	6	6	5	2	2	3	5	8	5	11	6	8	6	3	1	1	8	1	9	1	2	1	4	7	4	1	8	3	2	2	3	2	3	2	4	1	1
fig|6666666.374193.peg.92	3	4	3	2	2	8	3	1	3	3	7	1	5	5	4	1	0	2	4	4	5	5	4	4	2	4	1	1	5	1	7	1	2	0	0	1	3	1	4	4	2	1	2	1	2	2	1	0	2
[truncated: 124 more columns]
