# Supplementary material for: Expanding the Diversity of Myoviridae Phages Infecting Lactobacillus Plantarum - A Novel Lineage of Lactobacillus Phages Comprising Five New Members
Source: Preprints.org preprint supplement (doi:10.20944/preprints201812.0026.v1), 2018-12-03
Supplement: Supplementary file 3 [file Spreadsheet S3.xlsx]

## Sheet: Sheet1
	fig|6666666.374195.peg.171	fig|6666666.374195.peg.140	fig|6666666.374195.peg.36	fig|6666666.374195.peg.164	fig|6666666.374195.peg.64	fig|6666666.374195.peg.149	fig|6666666.374195.peg.168	fig|6666666.374195.peg.47	fig|6666666.374195.peg.96	fig|6666666.374195.peg.19	fig|6666666.374195.peg.166	fig|6666666.374195.peg.151	fig|6666666.374195.peg.88	fig|6666666.374195.peg.8	fig|6666666.374195.peg.123	fig|6666666.374195.peg.114	fig|6666666.374195.peg.113	fig|6666666.374195.peg.85	fig|6666666.374195.peg.89	fig|6666666.374195.peg.148	fig|6666666.374195.peg.3	fig|6666666.374195.peg.121	fig|6666666.374195.peg.115	fig|6666666.374195.peg.161	fig|6666666.374195.peg.27	fig|6666666.374195.peg.99	fig|6666666.374195.peg.93	fig|6666666.374195.peg.159	fig|6666666.374195.peg.52	fig|6666666.374195.peg.76	fig|6666666.374195.peg.157	fig|6666666.374195.peg.46	fig|6666666.374195.peg.82	fig|6666666.374195.peg.81	fig|6666666.374195.peg.152	fig|6666666.374195.peg.116	fig|6666666.374195.peg.106	fig|6666666.374195.peg.103	fig|6666666.374195.peg.18	fig|6666666.374195.peg.154	fig|6666666.374195.peg.117	fig|6666666.374195.peg.74	fig|6666666.374195.peg.143	fig|6666666.374195.peg.141	fig|6666666.374195.peg.129	fig|6666666.374195.peg.66	fig|6666666.374195.peg.146	fig|6666666.374195.peg.45	fig|6666666.374195.peg.95
fig|6666666.374195.peg.171		4	7	5	4	3	6	3	6	4	4	5	4	3	4	3	5	7	4	9	5	5	4	6	8	7	4	7	5	6	6	4	5	5	3	2	4	4	5	5	3	4	5	3	3	7	3	7	6
fig|6666666.374195.peg.140	4		2	4	5	9	5	3	2	7	3	9	4	3	6	6	8	5	9	4	6	8	8	6	7	8	5	2	4	5	4	3	4	4	6	7	5	4	6	2	8	2	3	5	7	9	5	3	5
fig|6666666.374195.peg.36	7	2		3	4	2	4	3	4	4	5	2	3	5	2	3	3	3	3	4	3	4	3	5	4	2	2	6	3	4	3	3	4	4	2	2	2	6	5	3	1	4	3	2	2	2	3	5	5
fig|6666666.374195.peg.164	5	4	3		7	8	5	6	4	8	8	5	5	3	8	7	6	7	7	7	8	4	7	6	7	6	6	5	6	6	4	7	3	6	4	7	4	8	8	2	5	5	9	5	4	6	5	5	7
fig|6666666.374195.peg.64	4	5	4	7		7	4	6	9	10	8	3	5	7	4	8	6	10	5	7	6	4	4	7	10	6	10	3	9	4	2	5	5	5	1	4	3	5	9	3	4	6	4	2	2	3	4	7	7
fig|6666666.374195.peg.149	3	9	2	8	7		7	5	3	8	8	6	7	3	4	8	6	4	10	5	4	7	7	4	3	4	6	4	3	4	7	8	7	5	4	8	8	3	6	2	5	2	4	6	5	4	8	5	4
fig|6666666.374195.peg.168	6	5	4	5	4	7		7	7	8	10	4	5	6	8	8	7	6	5	8	6	8	5	7	6	8	6	8	8	7	6	8	6	7	4	4	4	9	6	3	5	4	8	3	4	8	4	6	6
fig|6666666.374195.peg.47	3	3	3	6	6	5	7		6	7	4	4	7	3	4	8	6	6	9	11	8	7	6	5	4	5	6	4	8	5	5	13	4	6	5	5	4	5	3	2	2	2	6	4	5	7	5	5	6
fig|6666666.374195.peg.96	6	2	4	4	9	3	7	6		6	4	5	4	6	7	5	5	8	3	4	5	6	4	7	6	6	4	6	3	5	2	5	7	5	2	1	5	6	6	5	4	4	5	2	2	5	5	7	6
fig|6666666.374195.peg.19	4	7	4	8	10	8	8	7	6		5	4	9	5	8	8	7	10	6	5	7	10	5	6	6	5	7	5	6	8	5	13	3	6	7	6	5	4	6	3	6	2	9	5	5	9	5	6	9
fig|6666666.374195.peg.166	4	3	5	8	8	8	10	4	4	5		4	7	6	9	5	7	6	6	6	8	8	7	5	8	10	6	6	7	7	3	6	6	4	4	3	1	5	8	3	4	2	4	5	5	5	2	5	9
fig|6666666.374195.peg.151	5	9	2	5	3	6	4	4	5	4	4		8	4	6	7	7	11	5	6	8	6	4	6	5	5	4	2	6	5	4	7	4	2	5	3	9	2	3	2	7	2	4	5	4	7	5	2	5
fig|6666666.374195.peg.88	4	4	3	5	5	7	5	7	4	9	7	8		3	9	6	9	6	11	4	3	8	6	5	4	3	8	5	7	6	4	11	3	5	5	8	3	5	2	2	9	2	7	4	5	7	6	5	5
fig|6666666.374195.peg.8	3	3	5	3	7	3	6	3	6	5	6	4	3		5	5	5	4	4	4	5	6	3	7	4	3	4	4	4	4	3	3	5	6	2	2	2	4	4	3	3	3	4	3	2	3	4	6	7
fig|6666666.374195.peg.123	4	6	2	8	4	4	8	4	7	8	9	6	9	5		11	7	6	4	5	9	9	6	6	6	6	9	5	7	9	6	7	5	5	7	8	5	5	6	3	14	2	6	6	5	7	6	5	5
fig|6666666.374195.peg.114	3	6	3	7	8	8	8	8	5	8	5	7	6	5	11		12	7	17	10	9	11	3	7	9	6	9	4	10	6	8	11	3	9	6	7	4	8	8	2	7	2	3	8	7	8	11	4	5
fig|6666666.374195.peg.113	5	8	3	6	6	6	7	6	5	7	7	7	9	5	7	12		8	12	8	7	13	9	6	6	6	9	5	9	6	7	8	5	11	7	4	3	5	4	3	8	2	8	6	7	6	13	6	5
fig|6666666.374195.peg.85	7	5	3	7	10	4	6	6	8	10	6	11	6	4	6	7	8		5	8	6	5	6	8	5	7	5	4	10	6	5	10	6	8	5	3	7	5	6	3	5	2	9	2	2	8	5	5	7
fig|6666666.374195.peg.89	4	9	3	7	5	10	5	9	3	6	6	5	11	4	4	17	12	5		11	7	11	6	6	5	8	7	5	6	5	10	11	6	4	6	8	6	5	6	2	4	2	2	7	7	6	9	4	4
fig|6666666.374195.peg.148	9	4	4	7	7	5	8	11	4	5	6	6	4	4	5	10	8	8	11		8	8	8	8	8	4	9	6	6	5	5	9	7	8	6	4	8	8	7	2	8	3	8	9	9	9	9	7	7
fig|6666666.374195.peg.3	5	6	3	8	6	4	6	8	5	7	8	8	3	5	9	9	7	6	7	8		10	8	3	9	5	5	6	7	4	5	3	7	9	8	6	8	5	9	2	5	2	7	8	9	4	9	4	5
fig|6666666.374195.peg.121	5	8	4	4	4	7	8	7	6	10	8	6	8	6	9	11	13	5	11	8	10		9	10	10	12	10	5	11	5	6	8	4	5	7	8	5	8	6	2	7	4	5	8	7	6	6	7	8
fig|6666666.374195.peg.115	4	8	3	7	4	7	5	6	4	5	7	4	6	3	6	3	9	6	6	8	8	9		7	8	11	5	6	4	5	2	3	9	8	7	7	2	6	6	2	6	3	5	4	6	4	5	4	6
fig|6666666.374195.peg.161	6	6	5	6	7	4	7	5	7	6	5	6	5	7	6	7	6	8	6	8	3	10	7		8	3	9	6	7	5	5	7	8	8	2	4	3	6	7	4	4	4	8	5	3	7	7	6	8
fig|6666666.374195.peg.27	8	7	4	7	10	3	6	4	6	6	8	5	4	4	6	9	6	5	5	8	9	10	8	8		10	4	8	7	9	4	5	9	6	5	4	4	6	8	3	8	4	7	4	4	6	6	6	7
fig|6666666.374195.peg.99	7	8	2	6	6	4	8	5	6	5	10	5	3	3	6	6	6	7	8	4	5	12	11	3	10		6	4	6	7	4	5	5	5	4	3	3	7	6	2	7	2	4	3	5	5	4	5	8
fig|6666666.374195.peg.93	4	5	2	6	10	6	6	6	4	7	6	4	8	4	9	9	9	5	7	9	5	10	5	9	4	6		4	8	5	2	8	5	5	4	4	4	5	7	2	3	2	5	5	4	4	4	4	4
fig|6666666.374195.peg.159	7	2	6	5	3	4	8	4	6	5	6	2	5	4	5	4	5	4	5	6	6	5	6	6	8	4	4		3	6	1	4	8	8	3	3	2	6	6	5	2	4	4	2	3	5	6	6	4
fig|6666666.374195.peg.52	5	4	3	6	9	3	8	8	3	6	7	6	7	4	7	10	9	10	6	6	7	11	4	7	7	6	8	3		8	4	5	6	9	8	6	5	7	5	3	6	4	4	2	3	9	8	4	3
fig|6666666.374195.peg.76	6	5	4	6	4	4	7	5	5	8	7	5	6	4	9	6	6	6	5	5	4	5	5	5	9	7	5	6	8		2	4	7	5	5	2	2	8	9	3	6	2	5	4	3	7	6	5	6
fig|6666666.374195.peg.157	6	4	3	4	2	7	6	5	2	5	3	4	4	3	6	8	7	5	10	5	5	6	2	5	4	4	2	1	4	2		6	2	4	9	8	8	6	4	1	5	1	3	5	8	6	7	2	4
fig|6666666.374195.peg.46	4	3	3	7	5	8	8	13	5	13	6	7	11	3	7	11	8	10	11	9	3	8	3	7	5	5	8	4	5	4	6		6	6	7	4	7	5	5	2	10	2	4	7	9	7	11	4	9
fig|6666666.374195.peg.82	5	4	4	3	5	7	6	4	7	3	6	4	3	5	5	3	5	6	6	7	7	4	9	8	9	5	5	8	6	7	2	6		18	5	4	1	8	6	3	5	3	6	3	3	5	9	7	4
fig|6666666.374195.peg.81	5	4	4	6	5	5	7	6	5	6	4	2	5	6	5	9	11	8	4	8	9	5	8	8	6	5	5	8	9	5	4	6	18		4	3	3	6	5	4	5	2	5	4	4	7	6	7	6
fig|6666666.374195.peg.152	3	6	2	4	1	4	4	5	2	7	4	5	5	2	7	6	7	5	6	6	8	7	7	2	5	4	4	3	8	5	9	7	5	4		4	4	5	4	1	8	1	5	6	7	5	4	4	3
fig|6666666.374195.peg.116	2	7	2	7	4	8	4	5	1	6	3	3	8	2	8	7	4	3	8	4	6	8	7	4	4	3	4	3	6	2	8	4	4	3	4		11	4	3	1	4	2	2	5	5	6	3	3	3
fig|6666666.374195.peg.106	4	5	2	4	3	8	4	4	5	5	1	9	3	2	5	4	3	7	6	8	8	5	2	3	4	3	4	2	5	2	8	7	1	3	4	11		4	2	1	6	3	4	7	7	5	7	2	2
fig|6666666.374195.peg.103	4	4	6	8	5	3	9	5	6	4	5	2	5	4	5	8	5	5	5	8	5	8	6	6	6	7	5	6	7	8	6	5	8	6	5	4	4		7	2	2	4	8	3	4	6	7	9	8
fig|6666666.374195.peg.18	5	6	5	8	9	6	6	3	6	6	8	3	2	4	6	8	4	6	6	7	9	6	6	7	8	6	7	6	5	9	4	5	6	5	4	3	2	7		3	4	3	4	4	3	7	4	6	5
fig|6666666.374195.peg.154	5	2	3	2	3	2	3	2	5	3	3	2	2	3	3	2	3	3	2	2	2	2	2	4	3	2	2	5	3	3	1	2	3	4	1	1	1	2	3		3	7	2	2	1	3	2	4	4
fig|6666666.374195.peg.117	3	8	1	5	4	5	5	2	4	6	4	7	9	3	14	7	8	5	4	8	5	7	6	4	8	7	3	2	6	6	5	10	5	5	8	4	6	2	4	3		2	3	12	10	4	8	2	2
fig|6666666.374195.peg.74	4	2	4	5	6	2	4	2	4	2	2	2	2	3	2	2	2	2	2	3	2	4	3	4	4	2	2	4	4	2	1	2	3	2	1	2	3	4	3	7	2		3	2	2	3	4	4	4
fig|6666666.374195.peg.143	5	3	3	9	4	4	8	6	5	9	4	4	7	4	6	3	8	9	2	8	7	5	5	8	7	4	5	4	4	5	3	4	6	5	5	2	4	8	4	2	3	3		6	5	6	9	6	8
fig|6666666.374195.peg.141	3	5	2	5	2	6	3	4	2	5	5	5	4	3	6	8	6	2	7	9	8	8	4	5	4	3	5	2	2	4	5	7	3	4	6	5	7	3	4	2	12	2	6		62	4	11	2	4
fig|6666666.374195.peg.129	3	7	2	4	2	5	4	5	2	5	5	4	5	2	5	7	7	2	7	9	9	7	6	3	4	5	4	3	3	3	8	9	3	4	7	5	7	4	3	1	10	2	5	62		2	13	3	3
fig|6666666.374195.peg.66	7	9	2	6	3	4	8	7	5	9	5	7	7	3	7	8	6	8	6	9	4	6	4	7	6	5	4	5	9	7	6	7	5	7	5	6	5	6	7	3	4	3	6	4	2		9	5	7
fig|6666666.374195.peg.146	3	5	3	5	4	8	4	5	5	5	2	5	6	4	6	11	13	5	9	9	9	6	5	7	6	4	4	6	8	6	7	11	9	6	4	3	7	7	4	2	8	4	9	11	13	9		5	4
fig|6666666.374195.peg.45	7	3	5	5	7	5	6	5	7	6	5	2	5	6	5	4	6	5	4	7	4	7	4	6	6	5	4	6	4	5	2	4	7	7	4	3	2	9	6	4	2	4	6	2	3	5	5		5
fig|6666666.374195.peg.95	6	5	5	7	7	4	6	6	6	9	9	5	5	7	5	5	5	7	4	7	5	8	6	8	7	8	4	4	3	6	4	9	4	6	3	3	2	8	5	4	2	4	8	4	3	7	4	5
fig|6666666.374195.peg.61	7	5	4	9	7	5	10	4	9	5	5	3	3	5	3	6	4	5	5	8	8	4	4	5	5	7	7	5	5	6	4	4	6	6	2	3	3	8	6	3	4	5	5	3	3	9	3	6	7
fig|6666666.374195.peg.169	4	4	4	4	3	4	6	6	5	5	4	5	5	5	5	5	8	6	6	8	4	9	7	5	4	5	6	5	6	4	3	6	4	4	2	6	5	3	3	2	6	2	6	3	3	3	3	5	3
fig|6666666.374195.peg.32	2	1	2	1	2	1	1	1	2	1	1	1	1	1	1	1	1	1	1	1	1	1	1	1	1	1	1	1	1	1	1	1	1	1	0	1	1	1	1	3	1	3	1	0	0	1	1	2	2
fig|6666666.374195.peg.20	2	1	2	1	2	1	1	1	1	1	1	1	0	1	1	1	1	1	1	1	1	1	1	1	1	1	1	1	1	2	0	1	1	1	1	1	1	1	1	4	1	4	1	1	1	1	1	2	1
fig|6666666.374195.peg.23	3	1	3	2	2	1	3	3	3	3	2	1	1	3	1	2	2	3	2	2	1	2	2	2	2	2	2	4	2	2	1	3	1	3	1	1	1	3	3	5	1	4	1	1	0	1	1	3	3
fig|6666666.374195.peg.24	5	5	3	6	5	6	5	4	4	8	5	8	4	4	3	8	7	6	8	7	7	8	7	7	8	7	7	4	6	7	4	10	6	7	6	5	4	7	4	2	7	3	4	5	6	5	7	2	6
fig|6666666.374195.peg.57	3	3	4	7	8	4	4	4	5	3	5	3	2	3	3	4	4	7	5	8	5	4	3	1	3	3	7	6	4	4	2	3	9	4	3	3	5	5	5	3	2	3	5	2	2	4	5	3	6
fig|6666666.374195.peg.30	4	2	3	2	2	1	2	1	3	2	2	1	1	2	1	1	2	2	1	1	1	2	1	2	3	2	1	3	1	3	1	1	2	1	1	1	1	2	2	4	1	5	2	1	1	2	2	2	3
fig|6666666.374195.peg.72	4	4	3	8	7	5	6	8	4	3	6	4	6	3	6	6	10	5	6	10	4	12	10	3	4	7	5	5	7	7	4	6	8	6	4	3	2	6	5	1	5	3	7	6	7	3	8	3	5
fig|6666666.374195.peg.16	4	1	5	3	2	3	3	2	4	2	2	1	1	3	2	1	2	1	2	2	3	2	3	2	3	2	1	4	2	4	1	1	4	3	1	1	1	2	2	6	2	6	2	1	1	1	2	3	3
fig|6666666.374195.peg.22	3	1	3	2	4	1	2	2	3	2	2	1	1	2	2	1	1	2	1	2	1	1	2	1	2	2	1	2	2	1	1	1	2	1	1	1	1	3	2	5	2	5	1	0	0	2	2	2	2
fig|6666666.374195.peg.26	8	3	4	7	5	7	7	7	7	4	9	3	5	5	5	7	4	5	5	7	4	7	5	6	4	5	3	3	6	6	3	6	5	3	3	2	4	4	7	2	5	4	4	3	3	8	6	4	6
fig|6666666.374195.peg.21	2	0	3	2	1	1	2	1	2	2	2	1	1	2	2	1	2	1	1	2	1	2	1	2	2	2	1	2	2	2	1	2	2	2	1	1	1	2	2	5	1	4	1	1	1	2	2	2	3
fig|6666666.374195.peg.162	7	4	6	9	7	6	10	6	7	6	6	2	4	6	4	8	6	5	5	7	4	8	7	4	6	8	5	7	7	6	4	9	5	6	3	4	3	7	6	3	6	3	5	2	2	5	6	6	8
fig|6666666.374195.peg.33	5	6	3	9	7	6	5	6	6	10	6	4	4	5	9	12	6	8	4	7	6	9	6	5	6	6	5	6	7	8	4	8	8	7	6	4	3	7	9	2	5	3	5	6	5	8	7	6	6
fig|6666666.374195.peg.91	4	7	3	5	7	5	6	6	4	8	4	7	10	3	11	6	10	6	9	8	7	9	8	5	7	6	7	7	8	3	3	7	5	4	6	5	5	5	2	3	7	2	6	2	5	8	7	5	4
fig|6666666.374195.peg.71	5	3	4	5	9	3	6	2	5	8	4	5	6	5	6	7	8	7	6	9	8	5	6	6	4	5	5	8	4	7	3	5	3	7	5	4	3	8	8	2	5	4	6	3	5	3	4	5	5
fig|6666666.374195.peg.97	5	3	6	4	5	4	6	3	6	4	2	3	3	5	3	3	5	4	4	4	4	4	3	3	4	3	3	8	3	4	2	3	6	4	2	2	2	7	5	5	2	3	4	2	2	5	5	5	6
fig|6666666.374195.peg.29	7	1	7	4	4	3	4	3	4	3	3	2	2	5	2	2	5	3	2	1	3	3	2	3	4	4	2	4	2	4	2	1	3	4	1	1	3	5	4	6	1	5	6	1	1	4	3	5	4
fig|6666666.374195.peg.10	4	2	5	2	4	2	3	2	4	3	3	1	2	6	3	2	3	3	2	3	2	2	2	2	5	3	2	5	4	3	1	2	4	3	1	0	1	5	3	4	2	5	3	1	2	2	3	4	6
fig|6666666.374195.peg.31	5	5	4	10	9	7	9	7	9	6	7	5	6	6	5	4	5	7	8	8	9	7	7	6	7	8	5	9	9	7	3	5	7	7	5	4	6	4	7	2	4	3	7	3	3	8	8	5	7
fig|6666666.374195.peg.147	5	3	7	4	5	4	7	5	5	4	6	2	3	6	3	3	4	5	3	5	3	4	4	6	5	4	3	6	4	6	2	5	6	4	3	2	2	5	5	3	3	4	5	3	2	6	5	6	6
fig|6666666.374195.peg.39	3	2	7	4	3	2	3	2	5	4	2	1	2	4	2	3	2	4	2	3	1	2	2	3	2	4	3	3	2	2	1	3	3	3	1	2	2	3	3	6	3	5	2	1	1	2	2	3	4
fig|6666666.374195.peg.6	3	5	2	4	2	5	3	5	2	6	3	9	6	2	6	9	6	5	6	6	7	7	4	4	7	4	4	1	7	2	11	7	3	5	9	5	7	3	5	2	8	2	3	6	5	7	4	2	5
fig|6666666.374195.peg.2	3	5	4	4	7	9	8	7	4	7	5	5	5	3	3	8	5	7	8	9	3	5	4	12	9	4	10	3	7	7	4	7	6	6	6	3	3	5	8	5	5	3	4	3	3	10	4	5	6
fig|6666666.374195.peg.163	5	6	2	8	9	7	8	9	7	12	8	6	5	7	8	11	6	7	7	9	5	12	5	5	7	7	5	5	8	4	4	9	6	6	5	1	5	5	6	4	7	2	8	4	5	6	4	8	10
fig|6666666.374195.peg.101	4	6	4	6	6	7	7	7	5	7	4	8	6	5	6	4	7	6	5	3	7	8	4	8	6	4	6	4	6	4	4	6	5	4	2	4	9	5	4	3	7	3	3	2	1	7	3	3	5
fig|6666666.374195.peg.156	4	4	1	10	4	5	4	5	6	5	5	9	9	2	3	6	4	6	11	8	6	8	6	4	8	7	6	2	7	6	5	5	5	5	5	3	5	7	4	1	7	2	9	7	5	4	9	4	4
fig|6666666.374195.peg.124	5	5	5	6	10	6	6	8	8	7	10	4	7	5	7	7	6	11	10	8	6	8	6	8	8	8	8	6	6	6	4	8	6	7	5	4	4	5	6	2	4	4	6	4	5	9	5	5	12
fig|6666666.374195.peg.48	5	5	3	6	7	5	5	3	6	5	7	3	4	4	4	5	5	6	4	7	3	6	5	6	6	9	5	4	4	6	3	6	5	4	4	3	3	7	8	3	5	6	6	3	3	8	5	6	10
fig|6666666.374195.peg.87	8	4	3	6	6	6	9	6	7	7	6	7	6	4	7	7	5	11	7	8	8	7	5	7	5	8	4	4	5	5	6	8	2	6	4	4	7	7	5	3	6	3	8	3	4	8	6	6	6
fig|6666666.374195.peg.9	6	2	5	7	7	4	5	3	7	5	5	1	3	8	3	3	4	4	3	4	3	3	3	5	5	3	3	4	4	7	3	2	4	7	2	2	2	7	5	3	3	5	5	3	2	4	4	7	5
fig|6666666.374195.peg.67	5	1	5	3	4	3	3	3	4	3	4	2	1	6	3	3	3	3	3	4	4	3	2	2	3	4	2	4	2	3	2	4	3	4	2	2	2	6	2	5	2	6	3	1	2	2	2	5	6
fig|6666666.374195.peg.102	6	3	5	5	8	4	4	7	7	8	6	3	5	5	4	3	2	4	5	8	5	6	4	6	6	5	7	6	4	7	2	6	6	5	5	4	4	5	8	3	5	5	5	2	2	7	5	6	7
fig|6666666.374195.peg.100	5	6	1	9	7	5	4	9	4	4	7	3	5	3	6	5	8	8	6	7	4	9	10	6	6	8	8	4	13	5	3	5	5	5	11	6	3	5	8	2	7	3	6	6	5	4	5	4	6
fig|6666666.374195.peg.79	4	3	6	3	5	3	3	5	7	4	5	2	2	6	4	3	6	4	3	2	2	4	4	5	4	3	3	7	4	3	2	2	3	5	2	2	2	6	6	6	2	6	4	2	2	4	4	6	6
fig|6666666.374195.peg.54	3	6	4	8	4	5	7	7	4	9	6	8	9	5	11	6	6	4	7	5	8	13	5	7	6	5	5	5	8	4	10	6	7	5	8	3	3	3	8	1	7	3	4	7	7	6	9	4	5
fig|6666666.374195.peg.111	4	3	3	7	6	6	7	7	5	5	5	3	9	3	8	9	7	7	4	7	5	9	9	10	6	7	7	4	8	6	6	7	7	6	4	3	4	5	6	2	13	3	7	4	5	5	4	5	6
fig|6666666.374195.peg.11	5	2	6	3	5	3	7	3	4	8	4	3	3	6	3	5	5	5	5	4	3	6	3	3	3	4	6	5	5	4	3	5	3	3	2	1	1	4	5	4	3	4	4	2	2	4	2	5	6
fig|6666666.374195.peg.94	5	3	6	5	5	3	6	3	5	4	4	4	4	5	4	3	4	4	4	3	3	5	4	5	5	2	4	4	4	5	1	4	3	4	3	2	1	6	6	4	1	5	5	1	1	5	3	6	7
fig|6666666.374195.peg.133	5	7	6	7	6	5	6	6	5	8	5	5	3	5	6	9	7	6	5	8	10	7	10	9	6	6	6	6	9	5	5	6	6	6	4	5	4	7	6	2	7	3	5	6	6	5	9	4	6
fig|6666666.374195.peg.130	4	6	5	9	12	8	5	8	6	9	4	3	4	4	5	10	5	8	6	7	7	7	6	5	5	5	9	5	9	3	5	12	9	9	3	6	7	7	7	3	5	4	5	7	7	5	8	3	5
fig|6666666.374195.peg.63	4	8	4	5	5	8	6	7	5	8	6	4	5	3	6	6	11	5	6	6	2	13	4	7	6	6	7	4	9	8	7	6	6	8	5	6	4	8	5	2	7	3	6	5	6	6	5	6	3
fig|6666666.374195.peg.1	4	5	5	8	3	4	8	7	7	7	5	5	9	4	6	5	7	7	6	8	3	10	3	6	7	8	5	5	5	6	2	11	7	7	6	3	4	7	4	2	9	2	9	6	5	6	8	6	5
fig|6666666.374195.peg.25	6	5	4	8	6	5	8	8	6	11	8	3	9	3	5	5	7	7	8	6	9	7	7	7	5	10	2	5	6	7	5	7	5	8	4	5	6	6	8	3	8	3	5	6	5	5	5	7	8
fig|6666666.374195.peg.17	4	6	3	6	8	6	6	6	8	4	7	7	2	4	7	9	7	6	7	8	8	9	8	6	8	5	6	4	7	7	1	6	9	8	4	4	3	5	4	1	4	3	6	4	4	6	6	5	9
fig|6666666.374195.peg.13	5	3	4	5	8	6	6	7	8	5	7	7	4	5	5	4	3	5	3	9	7	6	8	7	6	4	3	7	4	7	2	7	5	6	3	3	4	8	5	3	5	4	6	3	3	6	6	3	8
fig|6666666.374195.peg.131	4	6	5	9	6	5	5	8	7	9	7	3	7	3	4	6	5	4	6	4	6	5	6	6	6	5	3	8	5	8	3	6	7	6	4	3	3	5	6	3	4	3	9	5	6	6	4	3	5
fig|6666666.374195.peg.128	6	7	2	6	4	8	4	7	5	6	6	4	10	3	11	16	6	7	12	5	9	9	6	5	8	6	9	3	10	5	8	7	8	5	6	13	7	4	5	2	8	2	5	3	5	5	8	3	4
fig|6666666.374195.peg.28	4	4	7	6	5	3	7	5	6	7	7	6	4	7	6	5	5	9	2	7	5	5	7	7	5	7	4	4	6	7	3	4	6	6	4	2	2	6	6	3	3	3	8	4	4	8	6	6	5
fig|6666666.374195.peg.107	2	8	1	4	3	4	3	4	3	5	3	10	6	1	5	8	5	6	10	5	7	8	2	4	5	4	6	2	6	3	4	5	3	5	4	11	4	4	3	1	6	2	3	7	8	8	6	2	2
fig|6666666.374195.peg.37	6	8	5	8	8	4	6	4	3	6	6	4	4	3	4	5	6	6	5	6	6	7	6	5	5	8	4	7	8	4	3	4	5	8	3	3	4	6	6	3	3	4	8	2	2	6	3	4	6
fig|6666666.374195.peg.14	6	4	7	6	6	4	5	4	7	6	5	3	4	6	3	3	4	4	3	6	4	5	5	6	5	4	3	6	6	6	2	4	5	6	4	1	2	5	7	4	3	4	5	1	2	5	2	3	6
fig|6666666.374195.peg.75	6	8	3	8	6	3	7	3	5	5	7	5	5	4	5	8	8	4	5	7	6	12	5	4	8	8	5	5	9	6	3	8	9	8	4	4	3	6	4	3	7	4	7	5	5	7	7	7	8
fig|6666666.374195.peg.165	3	4	3	5	5	6	5	5	4	4	5	5	5	3	6	5	6	6	6	8	5	4	4	4	5	3	1	4	8	8	9	9	6	9	8	4	6	5	5	2	6	1	6	5	7	5	5	2	3
fig|6666666.374195.peg.41	5	3	4	6	2	5	5	11	4	4	4	3	6	3	4	3	5	5	6	6	6	4	4	5	7	1	2	2	2	4	4	4	7	1	2	5	4	4	3	1	9	1	5	4	4	5	10	5	5
fig|6666666.374195.peg.155	6	7	4	9	12	7	9	10	5	12	4	6	7	4	6	6	6	7	8	8	8	7	7	6	8	7	7	5	7	8	4	6	3	3	5	5	4	6	8	3	7	4	6	3	4	6	7	5	6
fig|6666666.374195.peg.69	3	4	2	4	8	6	5	9	3	7	6	5	4	5	5	4	5	7	8	8	5	5	6	9	4	6	4	3	3	3	2	8	7	4	2	5	3	5	4	2	7	2	3	3	3	4	6	4	4
fig|6666666.374195.peg.144	3	4	2	3	7	7	4	8	4	5	7	6	8	4	7	12	8	8	8	7	3	4	3	5	3	6	7	4	11	6	6	11	4	6	4	4	6	3	5	2	6	2	8	7	5	5	5	3	5
fig|6666666.374195.peg.7	5	2	5	3	4	3	3	2	5	2	4	2	2	5	2	2	2	3	2	2	3	2	2	3	4	2	3	4	3	2	1	2	4	3	2	2	2	5	3	6	1	5	4	1	1	3	3	4	4
fig|6666666.374195.peg.125	4	1	3	2	5	6	2	5	4	7	3	1	4	3	4	7	5	8	8	2	6	4	7	6	6	2	4	3	4	6	5	6	2	5	2	2	5	5	4	1	4	3	7	4	4	2	10	2	3
fig|6666666.374195.peg.120	4	5	2	7	8	7	5	1	5	3	4	5	5	4	8	7	4	7	7	6	6	3	5	3	5	3	6	2	7	2	5	7	3	5	6	6	9	2	3	2	9	1	4	6	5	8	4	4	5
fig|6666666.374195.peg.118	4	5	3	8	6	5	3	7	1	6	7	7	9	2	9	9	9	6	6	6	6	6	6	3	4	4	10	4	6	4	4	8	4	11	7	7	2	5	6	1	7	2	7	5	4	5	7	5	4
fig|6666666.374195.peg.110	5	5	2	5	3	8	5	9	4	4	5	7	12	0	4	7	9	8	13	6	5	4	6	2	2	3	6	2	7	4	5	5	3	7	4	7	6	5	3	2	6	3	5	3	4	5	7	3	3
fig|6666666.374195.peg.170	4	6	1	3	2	8	3	7	2	5	5	6	6	3	6	8	8	4	8	6	4	2	5	5	2	4	5	2	5	5	5	3	3	3	7	6	7	4	4	2	9	2	2	3	3	6	5	3	5
fig|6666666.374195.peg.84	4	8	4	6	8	8	7	6	4	6	6	5	5	4	9	5	7	9	3	5	7	6	5	5	7	6	4	4	6	7	6	6	5	5	6	6	7	5	6	2	9	3	4	6	6	9	8	4	6
fig|6666666.374195.peg.60	10	4	5	4	5	5	8	4	7	5	5	4	4	4	5	3	5	5	5	5	4	6	4	7	7	4	4	7	4	5	4	2	5	6	4	2	4	6	7	4	5	5	4	3	2	6	5	7	7
fig|6666666.374195.peg.55	7	2	5	8	6	4	7	5	7	9	4	5	6	4	6	4	6	5	4	7	8	6	3	5	6	6	9	7	5	6	3	6	7	6	3	3	3	8	8	3	5	4	3	3	3	6	6	4	7
fig|6666666.374195.peg.53	7	5	5	4	5	7	9	7	7	6	7	5	5	6	5	6	5	7	6	7	5	7	7	5	7	6	3	7	6	7	6	6	4	5	3	1	3	5	7	3	6	3	5	4	4	6	4	6	5
fig|6666666.374195.peg.43	7	5	5	4	7	3	8	7	8	8	6	3	3	7	7	5	5	6	3	7	5	6	5	6	5	6	6	7	5	5	3	6	3	5	3	2	2	8	4	5	3	4	9	3	4	6	3	4	7
fig|6666666.374195.peg.167	5	2	4	3	2	4	6	3	4	3	3	3	3	3	2	2	3	3	3	5	4	5	3	4	3	4	2	5	3	4	3	2	5	4	1	2	1	5	4	6	3	6	3	2	1	3	5	3	4
fig|6666666.374195.peg.98	5	2	4	2	4	3	6	3	3	3	3	3	2	4	3	3	4	4	4	4	5	6	2	5	3	3	3	3	3	4	2	2	4	4	2	2	2	4	4	5	3	7	3	2	2	4	2	3	5
fig|6666666.374195.peg.92	5	2	4	2	3	4	6	3	3	2	3	2	2	3	3	2	3	3	4	3	4	4	3	4	4	2	2	3	2	5	2	2	4	3	2	2	2	5	4	4	3	7	3	2	2	4	2	4	5
fig|6666666.374195.peg.78	6	1	4	3	4	3	3	3	4	4	2	3	3	4	2	3	3	3	2	2	3	4	2	3	2	2	2	4	2	3	3	3	3	4	1	1	1	3	3	6	2	6	3	1	1	3	3	3	5
fig|6666666.374195.peg.59	5	1	5	2	2	2	3	1	3	2	3	1	1	3	2	2	2	2	2	2	2	2	2	2	2	3	2	4	2	3	1	2	2	3	1	1	1	3	3	7	1	6	2	1	2	2	2	3	4
fig|6666666.374195.peg.160	3	3	2	6	4	7	4	4	5	7	8	7	9	0	5	10	8	6	4	8	4	8	7	9	6	6	5	3	12	4	7	7	6	5	6	5	5	3	5	2	6	3	4	8	5	8	7	3	5
fig|6666666.374195.peg.86	3	1	4	2	4	1	3	2	3	3	2	1	1	2	1	1	2	2	2	2	2	2	3	2	3	2	1	2	1	2	1	1	2	2	2	1	1	3	2	5	1	6	2	1	1	2	2	3	3
fig|6666666.374195.peg.138	4	3	2	9	5	11	5	8	5	8	8	4	6	3	6	3	10	8	12	9	9	7	7	9	7	10	8	6	5	7	10	10	9	10	5	3	10	6	7	3	5	3	8	9	9	6	9	6	6
fig|6666666.374195.peg.68	3	2	3	3	5	3	4	3	6	4	5	2	3	5	2	3	4	5	4	4	2	3	5	3	3	4	3	4	3	4	1	4	2	3	2	1	1	5	4	6	1	4	3	1	2	3	3	4	8
fig|6666666.374195.peg.42	4	1	4	4	3	2	4	3	4	3	3	2	1	4	2	2	3	2	2	3	3	4	2	4	3	3	3	3	2	3	1	2	2	3	2	1	1	5	3	7	2	6	1	1	1	2	2	4	4
fig|6666666.374195.peg.104	4	8	4	6	4	6	4	6	3	6	8	7	8	3	9	6	5	6	5	7	4	9	3	8	8	6	5	2	5	7	6	7	7	4	8	4	4	4	6	2	6	2	5	4	4	9	5	4	4
fig|6666666.374195.peg.38	6	3	5	5	4	2	5	2	7	5	4	2	3	4	3	3	4	4	4	5	3	6	6	5	6	5	2	5	3	3	4	3	4	4	4	1	5	6	5	4	2	5	4	2	3	3	4	6	7
fig|6666666.374195.peg.4	5	4	8	6	4	4	6	3	5	6	4	3	3	4	4	3	3	4	4	6	3	5	5	5	5	4	4	5	4	6	3	3	5	4	2	3	2	8	5	4	4	6	3	4	3	6	3	6	6
fig|6666666.374195.peg.80	4	5	7	7	8	6	7	5	6	7	5	6	5	4	6	5	4	6	4	4	4	6	8	5	5	6	5	4	5	4	2	5	6	5	3	2	3	4	5	5	7	4	6	3	2	4	4	4	7
fig|6666666.374195.peg.139	4	3	3	6	7	3	4	6	4	9	6	6	4	4	3	5	6	7	7	13	4	12	10	9	4	7	9	4	9	4	5	7	4	4	8	7	4	6	6	2	9	2	3	5	3	5	6	2	7
fig|6666666.374195.peg.112	3	6	1	2	2	7	3	3	3	3	1	6	6	0	2	6	3	4	7	4	3	3	5	2	2	5	5	2	4	3	4	7	5	4	5	7	9	3	4	1	6	1	3	12	9	3	4	2	3
fig|6666666.374195.peg.34	4	2	5	4	3	2	3	2	4	3	3	1	2	3	3	2	4	4	4	4	3	4	3	4	5	4	3	5	3	5	2	2	4	5	2	1	1	5	4	6	2	6	1	2	2	3	4	3	5
fig|6666666.374195.peg.5	4	2	6	3	5	3	2	2	4	3	2	3	2	5	2	3	3	4	3	2	2	4	4	5	4	3	2	4	3	4	2	3	5	3	2	1	2	6	4	6	2	4	4	2	1	4	4	5	6
fig|6666666.374195.peg.136	3	5	2	7	6	8	4	6	2	4	7	9	6	5	5	5	8	9	3	6	8	5	6	5	4	5	4	4	4	6	6	6	5	6	6	7	3	5	4	2	6	1	5	5	5	5	7	4	2
fig|6666666.374195.peg.134	4	10	3	7	5	5	5	5	3	7	6	9	9	2	7	10	5	5	11	8	6	7	7	5	10	3	7	4	4	6	7	9	5	2	6	9	3	5	3	2	4	2	5	5	5	13	8	4	6
fig|6666666.374195.peg.83	6	3	6	5	5	5	6	3	6	6	6	5	6	5	4	5	6	4	7	6	5	9	6	6	7	4	5	5	8	7	2	6	4	6	4	3	5	4	6	4	5	3	5	4	4	5	6	3	6
fig|6666666.374195.peg.65	6	2	6	5	5	4	3	4	6	6	5	3	4	6	4	5	6	8	4	5	5	6	5	4	5	4	3	5	8	6	2	7	6	5	4	3	3	5	6	3	6	4	4	4	4	6	5	5	6
fig|6666666.374195.peg.58	4	5	4	11	7	10	4	7	5	5	5	5	4	4	4	11	5	5	8	7	6	6	5	5	4	7	6	3	4	4	6	9	7	6	4	3	5	8	5	2	4	2	8	7	7	3	7	4	5
fig|6666666.374195.peg.145	5	3	6	6	6	4	6	6	6	7	6	4	4	5	4	3	4	4	4	4	4	4	5	6	5	3	5	8	4	4	1	6	6	5	2	2	1	5	6	6	3	4	4	2	3	6	4	5	7
fig|6666666.374195.peg.62	3	8	3	4	4	6	2	4	4	6	2	8	3	1	3	6	5	3	4	5	5	5	4	6	3	3	3	1	2	2	4	4	1	2	2	3	5	2	1	2	8	1	2	14	8	6	7	2	3
fig|6666666.374195.peg.12	7	3	5	4	4	3	7	3	8	4	3	2	3	4	2	5	6	4	5	4	4	5	3	7	5	5	3	8	5	5	3	4	4	6	1	3	2	8	5	5	2	4	4	1	1	6	4	4	6
fig|6666666.374195.peg.73	6	3	6	5	5	3	9	3	7	6	6	2	5	7	5	3	3	5	3	4	4	4	4	7	5	5	3	5	5	6	2	4	4	6	1	2	4	7	6	5	1	5	5	2	2	3	3	7	6
fig|6666666.374195.peg.49	5	4	5	5	7	3	6	2	4	4	5	3	3	4	5	4	4	3	4	5	3	5	3	8	7	4	6	5	4	7	2	5	5	6	3	2	2	6	4	4	3	5	4	3	3	6	5	5	6
fig|6666666.374195.peg.126	6	2	4	6	7	3	7	4	5	6	6	3	5	6	5	5	5	5	4	4	4	7	3	6	5	4	3	5	5	6	3	7	5	7	4	3	4	4	5	3	5	4	6	3	3	7	2	3	12
fig|6666666.374195.peg.50	5	2	4	4	4	4	4	4	4	5	4	3	3	3	4	2	4	3	3	4	3	4	2	5	4	4	3	4	4	4	1	4	4	3	4	1	1	4	6	5	3	3	3	2	1	4	2	4	6
fig|6666666.374195.peg.44	6	2	4	3	4	4	7	4	4	4	4	3	3	5	4	4	3	5	2	3	3	4	3	5	6	4	4	5	3	5	2	4	3	4	2	3	1	8	4	4	3	4	5	2	2	5	3	5	6
fig|6666666.374195.peg.40	6	3	6	3	6	3	5	4	6	5	5	3	2	4	4	2	4	3	3	4	6	5	4	4	4	4	3	5	3	5	3	3	4	4	1	1	2	4	5	6	3	5	3	3	3	6	5	5	6
fig|6666666.374195.peg.105	6	4	4	6	6	4	5	3	6	7	6	4	5	4	3	4	4	5	4	4	6	6	6	5	6	6	4	5	6	5	4	6	3	5	6	4	4	8	4	4	5	4	5	1	2	7	4	8	8
fig|6666666.374195.peg.70	5	4	4	5	6	3	4	5	7	6	6	4	4	5	6	5	5	6	5	6	2	7	5	6	7	3	5	5	6	5	3	4	8	6	4	2	3	8	4	5	2	4	6	1	1	6	4	7	8
fig|6666666.374195.peg.77	6	4	5	5	7	5	6	3	7	4	6	5	3	6	4	3	4	5	5	7	5	6	1	5	6	6	5	6	5	8	4	6	6	3	4	2	3	5	6	3	3	4	4	2	2	5	5	5	10
fig|6666666.374195.peg.153	6	10	4	7	7	7	4	4	6	8	6	8	5	4	9	8	4	5	6	8	8	9	9	10	11	8	9	4	9	7	5	6	11	4	7	3	5	6	7	2	7	2	4	3	4	5	4	4	7
fig|6666666.374195.peg.150	3	3	2	6	3	5	3	7	4	5	5	7	9	3	7	7	5	3	13	5	5	5	4	3	2	4	5	2	5	5	4	10	3	2	2	9	8	5	4	1	5	2	3	6	7	7	7	3	4
fig|6666666.374195.peg.132	4	5	3	6	7	8	8	7	3	6	5	5	10	7	19	8	10	9	9	10	5	7	8	7	6	7	8	3	6	6	5	8	5	5	6	6	4	7	3	2	6	2	6	4	3	4	5	4	6
fig|6666666.374195.peg.127	4	9	2	12	7	8	5	6	6	6	5	3	8	6	13	12	4	8	6	7	5	10	11	6	7	7	6	5	6	2	8	6	5	6	6	11	4	4	6	2	6	2	10	4	3	7	5	6	7
fig|6666666.374195.peg.137	4	7	3	7	4	7	5	6	4	9	8	6	10	3	9	5	5	6	5	6	4	8	8	6	6	8	7	4	6	6	4	6	3	4	13	7	6	5	8	2	9	2	8	7	8	8	10	5	3
fig|6666666.374195.peg.122	4	4	3	4	5	3	3	4	4	6	5	5	8	1	9	5	8	7	6	5	4	8	6	4	8	4	5	2	8	5	6	7	3	3	5	4	3	5	4	2	8	2	3	7	7	7	8	4	3
fig|6666666.374195.peg.56	2	4	3	3	5	2	5	8	6	6	5	7	9	5	6	8	7	9	4	4	7	8	9	8	7	6	7	4	11	9	6	3	6	9	8	5	2	7	5	2	4	2	5	6	7	9	5	4	8
fig|6666666.374195.peg.51	4	4	4	6	7	7	5	6	3	6	5	5	6	4	6	9	6	6	7	5	5	6	6	6	7	7	4	5	6	6	6	7	3	6	4	2	7	4	6	2	9	3	6	4	4	8	5	4	8
fig|6666666.374195.peg.15	4	6	1	7	4	10	4	5	4	6	6	10	11	2	7	11	6	6	6	8	5	5	9	5	8	6	7	3	9	6	6	5	4	4	9	5	6	6	5	3	5	2	5	7	6	8	7	3	4
fig|6666666.374195.peg.142	4	5	2	9	5	8	6	4	4	8	7	8	11	3	5	4	6	10	7	11	8	7	7	6	5	7	9	6	7	7	6	8	8	8	3	2	4	5	7	2	6	2	10	5	2	7	9	2	5
fig|6666666.374195.peg.35	6	6	6	6	8	7	7	5	7	7	9	4	8	5	4	5	8	10	6	3	4	5	9	5	8	8	8	7	4	7	4	6	4	7	3	1	5	7	7	2	5	3	7	3	4	4	5	5	6
fig|6666666.374195.peg.119	4	9	2	9	7	9	4	7	3	5	5	7	6	4	9	16	10	4	11	10	8	9	3	6	5	5	5	5	6	5	9	7	4	4	5	10	5	6	5	2	10	2	5	6	5	8	11	4	5
fig|6666666.374195.peg.109	3	5	4	8	6	6	5	4	6	7	7	2	9	3	9	6	8	6	5	8	5	11	10	6	9	6	5	4	6	7	5	6	3	3	4	4	5	7	10	2	6	2	7	4	4	4	7	4	7
fig|6666666.374195.peg.108	5	3	2	4	4	5	4	8	5	4	7	2	4	4	5	6	6	8	6	8	6	8	7	6	5	5	6	4	6	8	2	4	4	4	6	6	3	5	5	1	5	2	1	7	5	4	7	5	4
fig|6666666.374195.peg.135	3	5	2	4	6	7	5	6	3	7	6	5	7	2	8	8	6	5	7	8	6	6	7	7	5	7	7	4	8	8	4	9	6	8	9	2	3	4	7	2	7	2	7	4	3	6	6	3	6
fig|6666666.374195.peg.90	2	6	1	4	4	5	4	4	1	4	3	3	2	1	6	3	5	2	3	4	4	7	7	2	6	5	7	2	3	4	10	3	5	2	9	10	3	2	3	1	4	1	4	3	5	3	3	1	3
fig|6666666.374195.peg.158	1	6	2	4	2	6	2	3	3	3	1	7	2	3	3	2	2	1	2	3	3	5	1	6	3	2	3	3	5	2	4	5	4	7	1	2	11	3	2	1	6	1	4	6	6	5	6	3	3
[truncated: 122 more columns]
