# Supplementary material for: Expanding the Diversity of Myoviridae Phages Infecting Lactobacillus Plantarum - A Novel Lineage of Lactobacillus Phages Comprising Five New Members
Source: Preprints.org preprint supplement (doi:10.20944/preprints201812.0026.v1), 2018-12-03
Supplement: Supplementary file 4 [file Spreadsheet S4.xlsx]

## Sheet: Sheet1
	fig|6666666.374191.peg.172	fig|6666666.374191.peg.24	fig|6666666.374191.peg.22	fig|6666666.374191.peg.33	fig|6666666.374191.peg.23	fig|6666666.374191.peg.41	fig|6666666.374191.peg.31	fig|6666666.374191.peg.72	fig|6666666.374191.peg.18	fig|6666666.374191.peg.25	fig|6666666.374191.peg.150	fig|6666666.374191.peg.27	fig|6666666.374191.peg.98	fig|6666666.374191.peg.71	fig|6666666.374191.peg.91	fig|6666666.374191.peg.32	fig|6666666.374191.peg.101	fig|6666666.374191.peg.34	fig|6666666.374191.peg.133	fig|6666666.374191.peg.59	fig|6666666.374191.peg.76	fig|6666666.374191.peg.147	fig|6666666.374191.peg.100	fig|6666666.374191.peg.79	fig|6666666.374191.peg.96	fig|6666666.374191.peg.30	fig|6666666.374191.peg.3	fig|6666666.374191.peg.12	fig|6666666.374191.peg.169	fig|6666666.374191.peg.50	fig|6666666.374191.peg.77	fig|6666666.374191.peg.149	fig|6666666.374191.peg.113	fig|6666666.374191.peg.47	fig|6666666.374191.peg.168	fig|6666666.374191.peg.8	fig|6666666.374191.peg.44	fig|6666666.374191.peg.43	fig|6666666.374191.peg.6	fig|6666666.374191.peg.132	fig|6666666.374191.peg.129	fig|6666666.374191.peg.130	fig|6666666.374191.peg.118	fig|6666666.374191.peg.61	fig|6666666.374191.peg.145	fig|6666666.374191.peg.67	fig|6666666.374191.peg.11	fig|6666666.374191.peg.126	fig|6666666.374191.peg.20
fig|6666666.374191.peg.172		1	1	1	2	3	2	7	3	3	5	5	5	5	6	6	6	7	7	8	6	7	6	4	5	4	8	3	5	8	4	4	9	6	4	1	3	4	5	8	6	3	5	1	5	4	6	4	6
fig|6666666.374191.peg.24	1		10	8	6	2	4	1	2	1	1	2	1	1	1	1	1	1	1	1	1	1	1	1	2	2	1	2	1	2	1	1	1	1	1	2	3	0	1	1	1	1	0	4	1	1	1	1	1
fig|6666666.374191.peg.22	1	10		10	8	4	5	2	4	2	2	2	2	2	1	1	2	1	1	1	1	1	2	3	2	3	2	3	1	2	1	1	2	2	2	4	5	1	2	1	2	1	1	5	1	2	1	1	1
fig|6666666.374191.peg.33	1	8	10		7	4	5	2	4	2	2	2	1	2	2	1	2	2	1	1	2	2	2	3	2	3	2	3	2	2	2	1	2	2	1	2	4	0	3	1	1	1	0	4	1	2	2	1	1
fig|6666666.374191.peg.23	2	6	8	7		5	8	2	6	1	4	4	3	3	1	2	2	2	2	1	2	2	2	4	3	4	2	4	3	2	2	1	2	2	2	4	5	1	4	1	1	1	1	5	2	3	3	1	2
fig|6666666.374191.peg.41	3	2	4	4	5		6	4	5	5	4	6	3	5	4	4	3	3	3	3	2	3	4	9	4	6	3	5	3	4	4	3	4	5	3	5	4	2	5	3	4	2	2	5	4	5	4	2	3
fig|6666666.374191.peg.31	2	4	5	5	8	6		4	7	3	4	5	3	4	3	4	3	3	3	1	3	4	3	4	5	5	3	6	2	3	2	2	3	3	1	4	6	2	3	2	2	2	1	5	2	4	2	1	2
fig|6666666.374191.peg.72	7	1	2	2	2	4	4		4	14	4	4	10	10	4	8	6	11	7	8	7	8	4	2	4	3	6	5	6	6	6	4	8	5	7	2	3	3	3	5	6	7	5	2	6	4	6	3	5
fig|6666666.374191.peg.18	3	2	4	4	6	5	7	4		5	7	6	2	5	1	5	3	3	3	3	3	3	5	6	4	6	4	6	3	4	3	3	3	4	2	4	5	1	5	2	2	1	1	3	3	4	4	2	3
fig|6666666.374191.peg.25	3	1	2	2	1	5	3	14	5		8	10	7	4	8	8	10	8	9	9	7	9	5	4	4	4	10	2	8	10	6	7	7	3	11	3	4	3	4	6	11	10	8	2	10	4	7	7	7
fig|6666666.374191.peg.150	5	1	2	2	4	4	4	4	7	8		7	7	7	3	7	7	10	8	4	7	6	7	6	6	5	8	4	6	8	3	7	4	5	3	4	3	2	5	5	2	3	4	2	8	5	8	5	4
fig|6666666.374191.peg.27	5	2	2	2	4	6	5	4	6	10	7		6	7	5	7	7	8	5	6	7	7	8	6	5	5	6	5	6	7	6	6	6	6	5	5	5	3	5	5	3	5	4	3	7	6	6	3	6
fig|6666666.374191.peg.98	5	1	2	1	3	3	3	10	2	7	7	6		10	9	8	6	8	7	7	8	3	3	3	4	5	8	2	6	6	8	7	7	5	4	3	4	4	2	8	8	6	7	2	6	4	7	6	9
fig|6666666.374191.peg.71	5	1	2	2	3	5	4	10	5	4	7	7	10		7	8	6	6	8	6	7	7	6	3	6	5	8	5	4	8	5	6	11	7	3	3	4	2	4	6	6	3	6	2	8	7	5	4	8
fig|6666666.374191.peg.91	6	1	1	2	1	4	3	4	1	8	3	5	9	7		7	7	10	5	7	4	7	4	4	3	5	7	3	5	7	5	6	7	3	8	4	2	6	5	11	10	6	11	2	8	5	5	4	10
fig|6666666.374191.peg.32	6	1	1	1	2	4	4	8	5	8	7	7	8	8	7		6	6	11	6	9	7	8	6	4	5	8	4	9	12	6	7	9	6	4	3	4	6	6	9	5	7	6	2	7	3	7	7	7
fig|6666666.374191.peg.101	6	1	2	2	2	3	3	6	3	10	7	7	6	6	7	6		9	9	8	7	6	10	7	8	4	7	3	7	9	6	7	9	7	8	4	3	5	4	10	4	8	4	2	6	3	8	4	7
fig|6666666.374191.peg.34	7	1	1	2	2	3	3	11	3	8	10	8	8	6	10	6	9		9	12	7	9	6	3	4	4	9	4	9	8	4	10	7	9	7	4	3	3	6	8	6	13	7	2	7	6	8	6	8
fig|6666666.374191.peg.133	7	1	1	1	2	3	3	7	3	9	8	5	7	8	5	11	9	9		6	4	4	6	5	6	4	7	4	6	7	6	6	6	5	8	2	3	7	4	7	5	7	5	2	6	6	10	12	8
fig|6666666.374191.peg.59	8	1	1	1	1	3	1	8	3	9	4	6	7	6	7	6	8	12	6		5	5	7	4	5	3	6	3	5	4	5	5	5	5	8	4	3	3	4	7	5	6	5	2	9	4	5	4	6
fig|6666666.374191.peg.76	6	1	1	2	2	2	3	7	3	7	7	7	8	7	4	9	7	7	4	5		6	9	3	5	4	6	2	8	7	8	5	10	4	3	3	3	4	5	7	4	7	6	2	11	5	8	4	6
fig|6666666.374191.peg.147	7	1	1	2	2	3	4	8	3	9	6	7	3	7	7	7	6	9	4	5	6		7	5	5	5	8	4	8	8	6	6	9	5	7	3	3	4	5	8	5	7	6	3	6	5	6	5	8
fig|6666666.374191.peg.100	6	1	2	2	2	4	3	4	5	5	7	8	3	6	4	8	10	6	6	7	9	7		7	7	5	7	4	4	8	9	5	6	8	5	3	5	3	8	6	6	6	5	3	8	6	8	5	7
fig|6666666.374191.peg.79	4	1	3	3	4	9	4	2	6	4	6	6	3	3	4	6	7	3	5	4	3	5	7		8	9	5	5	6	6	5	4	4	5	3	5	6	2	7	3	4	2	3	4	4	6	5	3	5
fig|6666666.374191.peg.96	5	2	2	2	3	4	5	4	4	4	6	5	4	6	3	4	8	4	6	5	5	5	7	8		8	8	6	5	6	5	3	6	4	4	4	6	1	4	4	2	3	4	3	2	4	4	5	5
fig|6666666.374191.peg.30	4	2	3	3	4	6	5	3	6	4	5	5	5	5	5	5	4	4	4	3	4	5	5	9	8		6	8	6	6	5	3	6	3	3	5	5	3	6	4	5	2	3	4	4	7	2	4	5
fig|6666666.374191.peg.3	8	1	2	2	2	3	3	6	4	10	8	6	8	8	7	8	7	9	7	6	6	8	7	5	8	6		4	8	7	7	6	9	6	8	3	4	4	5	8	8	6	9	2	4	5	10	7	9
fig|6666666.374191.peg.12	3	2	3	3	4	5	6	5	6	2	4	5	2	5	3	4	3	4	4	3	2	4	4	5	6	8	4		2	5	5	3	5	7	2	6	5	3	6	3	2	2	2	5	3	8	3	1	3
fig|6666666.374191.peg.169	5	1	1	2	3	3	2	6	3	8	6	6	6	4	5	9	7	9	6	5	8	8	4	6	5	6	8	2		11	8	7	4	6	2	3	4	5	4	11	5	6	5	2	5	4	8	9	6
fig|6666666.374191.peg.50	8	2	2	2	2	4	3	6	4	10	8	7	6	8	7	12	9	8	7	4	7	8	8	6	6	6	7	5	11		8	9	9	5	5	3	4	4	5	6	5	5	5	3	6	6	7	6	8
fig|6666666.374191.peg.77	4	1	1	2	2	4	2	6	3	6	3	6	8	5	5	6	6	4	6	5	8	6	9	5	5	5	7	5	8	8		4	7	5	5	4	5	4	4	6	5	4	5	3	6	7	7	4	7
fig|6666666.374191.peg.149	4	1	1	1	1	3	2	4	3	7	7	6	7	6	6	7	7	10	6	5	5	6	5	4	3	3	6	3	7	9	4		7	6	5	3	2	4	2	8	4	6	7	2	7	3	6	7	4
fig|6666666.374191.peg.113	9	1	2	2	2	4	3	8	3	7	4	6	7	11	7	9	9	7	6	5	10	9	6	4	6	6	9	5	4	9	7	7		6	7	4	2	6	3	9	5	9	3	1	7	4	8	5	7
fig|6666666.374191.peg.47	6	1	2	2	2	5	3	5	4	3	5	6	5	7	3	6	7	9	5	5	4	5	8	5	4	3	6	7	6	5	5	6	6		5	4	4	4	3	5	4	6	2	2	5	3	4	3	6
fig|6666666.374191.peg.168	4	1	2	1	2	3	1	7	2	11	3	5	4	3	8	4	8	7	8	8	3	7	5	3	4	3	8	2	2	5	5	5	7	5		3	3	10	3	9	6	9	6	1	6	2	6	5	5
fig|6666666.374191.peg.8	1	2	4	2	4	5	4	2	4	3	4	5	3	3	4	3	4	4	2	4	3	3	3	5	4	5	3	6	3	3	4	3	4	4	3		6	1	6	3	3	2	2	5	3	5	2	2	3
fig|6666666.374191.peg.44	3	3	5	4	5	4	6	3	5	4	3	5	4	4	2	4	3	3	3	3	3	3	5	6	6	5	4	5	4	4	5	2	2	4	3	6		3	8	4	3	2	2	6	2	6	5	3	4
fig|6666666.374191.peg.43	4	0	1	0	1	2	2	3	1	3	2	3	4	2	6	6	5	3	7	3	4	4	3	2	1	3	4	3	5	4	4	4	6	4	10	1	3		3	7	6	8	2	1	3	4	5	4	3
fig|6666666.374191.peg.6	5	1	2	3	4	5	3	3	5	4	5	5	2	4	5	6	4	6	4	4	5	5	8	7	4	6	5	6	4	5	4	2	3	3	3	6	8	3		4	4	3	3	6	4	6	6	4	5
fig|6666666.374191.peg.132	8	1	1	1	1	3	2	5	2	6	5	5	8	6	11	9	10	8	7	7	7	8	6	3	4	4	8	3	11	6	6	8	9	5	9	3	4	7	4		13	17	11	2	6	4	5	11	8
fig|6666666.374191.peg.129	6	1	2	1	1	4	2	6	2	11	2	3	8	6	10	5	4	6	5	5	4	5	6	4	2	5	8	2	5	5	5	4	5	4	6	3	3	6	4	13		17	11	1	7	5	4	13	4
fig|6666666.374191.peg.130	3	1	1	1	1	2	2	7	1	10	3	5	6	3	6	7	8	13	7	6	7	7	6	2	3	2	6	2	6	5	4	6	9	6	9	2	2	8	3	17	17		12	2	6	4	7	8	7
fig|6666666.374191.peg.118	5	0	1	0	1	2	1	5	1	8	4	4	7	6	11	6	4	7	5	5	6	6	5	3	4	3	9	2	5	5	5	7	3	2	6	2	2	2	3	11	11	12		1	6	4	4	12	10
fig|6666666.374191.peg.61	1	4	5	4	5	5	5	2	3	2	2	3	2	2	2	2	2	2	2	2	2	3	3	4	3	4	2	5	2	3	3	2	1	2	1	5	6	1	6	2	1	2	1		2	3	2	1	2
fig|6666666.374191.peg.145	5	1	1	1	2	4	2	6	3	10	8	7	6	8	8	7	6	7	6	9	11	6	8	4	2	4	4	3	5	6	6	7	7	5	6	3	2	3	4	6	7	6	6	2		4	7	4	7
fig|6666666.374191.peg.67	4	1	2	2	3	5	4	4	4	4	5	6	4	7	5	3	3	6	6	4	5	5	6	6	4	7	5	8	4	6	7	3	4	3	2	5	6	4	6	4	5	4	4	3	4		7	3	4
fig|6666666.374191.peg.11	6	1	1	2	3	4	2	6	4	7	8	6	7	5	5	7	8	8	10	5	8	6	8	5	4	2	10	3	8	7	7	6	8	4	6	2	5	5	6	5	4	7	4	2	7	7		7	9
fig|6666666.374191.peg.126	4	1	1	1	1	2	1	3	2	7	5	3	6	4	4	7	4	6	12	4	4	5	5	3	5	4	7	1	9	6	4	7	5	3	5	2	3	4	4	11	13	8	12	1	4	3	7		8
fig|6666666.374191.peg.20	6	1	1	1	2	3	2	5	3	7	4	6	9	8	10	7	7	8	8	6	6	8	7	5	5	5	9	3	6	8	7	4	7	6	5	3	4	3	5	8	4	7	10	2	7	4	9	8
fig|6666666.374191.peg.170	3	2	2	2	4	4	3	4	6	6	6	6	3	6	4	5	6	5	6	3	3	4	7	8	5	4	3	4	4	8	4	4	5	5	4	4	5	3	5	4	3	3	3	4	4	6	4	2	5
fig|6666666.374191.peg.56	7	1	1	1	2	1	1	9	3	5	4	4	7	5	5	3	5	5	4	4	5	4	5	3	1	3	7	3	4	5	3	4	8	4	9	2	2	4	2	9	4	6	8	1	7	3	7	6	8
fig|6666666.374191.peg.87	2	1	2	2	3	3	3	4	5	4	5	5	4	4	5	6	8	5	5	4	4	3	8	7	6	4	6	5	6	5	5	3	6	4	4	4	5	3	5	6	4	3	3	3	5	4	7	3	5
fig|6666666.374191.peg.46	4	1	3	2	3	5	4	4	4	5	4	6	2	6	5	6	6	4	5	3	4	4	8	5	5	6	4	6	6	6	4	3	5	6	4	6	4	3	6	4	5	4	3	4	7	5	4	4	4
fig|6666666.374191.peg.5	4	1	2	1	3	3	3	4	4	5	6	5	4	4	4	4	5	4	7	5	7	3	7	5	5	5	3	5	5	7	6	4	3	6	4	3	5	3	5	5	4	5	1	3	6	7	6	5	3
fig|6666666.374191.peg.94	5	1	2	2	3	6	3	8	4	8	7	8	6	8	5	8	7	7	8	5	7	9	8	6	5	5	8	4	8	7	4	5	7	6	9	4	4	4	6	6	6	6	5	3	7	6	11	7	8
fig|6666666.374191.peg.45	4	1	2	1	3	4	3	6	4	7	6	5	3	5	6	6	5	6	6	5	4	7	6	6	6	5	7	3	4	9	5	4	8	4	7	3	5	4	4	5	6	5	4	3	7	6	8	6	10
fig|6666666.374191.peg.151	7	1	1	1	2	2	3	7	3	8	3	5	7	9	8	5	5	5	8	3	8	5	5	4	5	3	7	2	7	5	7	5	10	4	7	2	3	6	3	7	7	4	11	1	5	4	4	7	8
fig|6666666.374191.peg.4	4	1	1	1	1	1	1	4	2	5	3	2	4	4	7	4	5	4	4	7	4	4	4	2	2	2	7	1	5	2	4	3	5	3	5	2	2	8	2	4	5	5	3	1	5	2	6	6	2
fig|6666666.374191.peg.123	7	1	1	1	1	3	1	9	2	9	4	4	4	5	9	5	6	7	7	7	10	8	7	5	4	4	8	2	8	3	6	3	9	4	11	2	4	6	3	14	9	3	8	1	6	3	6	5	6
fig|6666666.374191.peg.92	4	1	1	1	2	3	3	4	3	4	6	7	6	5	5	5	7	3	8	8	6	3	6	4	6	4	5	4	5	7	8	3	5	2	4	2	3	4	5	5	3	5	3	2	6	5	8	4	6
fig|6666666.374191.peg.80	4	1	2	1	2	4	2	7	2	6	5	7	4	9	7	8	9	5	7	4	7	5	8	5	8	3	7	3	11	10	10	7	9	4	5	4	4	5	6	8	8	5	6	2	6	4	6	8	7
fig|6666666.374191.peg.53	9	1	1	1	3	4	2	3	3	9	6	7	5	7	9	7	7	6	10	6	6	7	8	6	4	4	9	3	8	9	10	7	4	4	6	3	5	7	5	7	5	8	6	2	7	6	7	8	10
fig|6666666.374191.peg.40	4	1	2	2	3	3	4	4	4	4	6	5	3	6	6	6	6	3	5	4	7	4	7	4	8	3	6	5	6	8	4	3	5	4	3	5	4	2	6	6	3	3	3	3	3	6	6	5	5
fig|6666666.374191.peg.161	5	0	1	0	1	1	1	7	1	6	2	2	5	1	4	1	4	8	2	4	7	3	2	1	2	2	2	1	6	2	3	3	4	2	7	1	2	3	2	6	3	5	2	1	5	1	4	2	6
fig|6666666.374191.peg.152	6	1	1	1	1	3	3	5	2	8	4	6	5	6	9	5	7	10	5	4	5	7	4	4	4	3	14	2	8	7	4	9	6	4	7	2	3	4	4	7	7	7	7	2	8	4	6	7	9
fig|6666666.374191.peg.124	6	1	1	1	2	3	3	7	2	5	3	3	7	5	6	5	9	10	6	3	3	5	7	3	3	1	7	2	4	6	5	7	7	6	4	2	4	4	3	7	8	9	4	1	4	4	5	6	6
fig|6666666.374191.peg.78	4	2	2	3	4	4	5	3	5	2	6	3	2	4	3	3	3	2	3	2	3	4	5	5	3	4	3	6	3	5	4	3	4	3	3	5	5	1	6	3	2	2	1	4	3	4	4	2	2
fig|6666666.374191.peg.107	8	0	1	1	1	2	1	6	1	5	4	5	7	5	10	6	7	5	7	4	4	5	3	3	5	2	8	2	6	4	2	7	6	4	6	2	2	3	2	5	7	5	5	1	6	3	3	6	5
fig|6666666.374191.peg.134	3	1	1	1	1	1	1	4	2	6	3	4	7	5	5	6	5	4	4	4	7	5	2	2	2	3	4	1	4	3	5	3	7	4	12	2	3	9	2	8	4	4	5	1	4	2	7	8	8
fig|6666666.374191.peg.167	5	1	2	2	2	4	2	5	3	9	8	7	4	5	8	4	5	11	5	6	5	8	7	5	6	4	5	4	8	8	4	6	7	4	6	3	5	3	6	6	7	9	7	2	6	6	7	7	4
fig|6666666.374191.peg.49	7	0	2	1	2	3	2	7	4	5	5	6	12	9	10	7	7	8	10	6	5	7	7	5	4	3	11	3	4	5	7	8	6	6	12	2	3	6	3	11	8	9	6	2	8	4	6	6	8
fig|6666666.374191.peg.21	6	1	1	2	2	3	3	5	3	7	5	5	5	6	4	6	9	9	8	6	7	8	6	4	5	5	9	1	6	4	4	5	7	5	9	2	3	5	3	8	6	8	5	1	7	3	8	3	9
fig|6666666.374191.peg.109	7	1	1	1	1	2	2	11	2	5	3	4	7	4	9	6	4	8	6	4	4	7	3	2	3	2	8	3	5	3	4	6	10	3	6	3	2	8	3	8	10	12	4	1	6	4	5	8	3
fig|6666666.374191.peg.125	5	1	1	1	2	3	2	8	3	5	4	3	6	7	8	4	4	5	6	7	3	5	5	4	3	4	8	2	8	7	4	5	6	4	8	3	2	6	4	6	4	5	7	1	9	3	5	6	6
fig|6666666.374191.peg.163	3	0	1	1	2	3	1	3	2	6	2	5	3	2	8	3	4	7	2	4	4	7	4	2	4	2	6	2	5	5	4	6	4	3	8	1	2	7	3	6	4	6	5	1	3	2	4	4	6
fig|6666666.374191.peg.88	1	2	4	4	5	3	5	1	4	3	3	3	2	3	2	3	2	1	3	3	3	2	3	4	3	4	2	4	2	3	3	2	1	3	1	5	5	1	4	2	2	1	2	5	2	4	2	2	2
fig|6666666.374191.peg.153	3	0	1	1	1	2	1	2	1	3	4	2	3	3	6	5	3	3	4	4	6	3	4	4	2	2	4	1	7	5	4	5	6	5	6	2	2	5	2	7	6	4	6	1	4	1	3	5	8
fig|6666666.374191.peg.115	4	0	1	1	2	2	2	4	2	5	3	6	6	5	7	5	6	5	5	3	3	4	6	5	4	3	6	1	6	6	5	7	3	4	8	1	4	4	2	9	6	5	9	1	6	2	4	10	7
fig|6666666.374191.peg.89	4	1	1	1	2	3	2	6	2	5	4	3	6	4	3	6	7	7	5	5	3	4	6	6	3	1	6	1	4	5	3	5	3	5	7	2	3	2	3	5	3	5	6	1	4	1	6	4	6
fig|6666666.374191.peg.66	6	0	1	1	2	4	2	4	2	10	6	8	8	6	7	7	6	5	6	7	9	5	6	5	6	6	10	3	5	6	8	7	6	6	6	3	3	4	5	7	7	4	7	1	5	5	6	6	10
fig|6666666.374191.peg.138	5	1	1	1	2	3	1	4	2	3	3	3	6	4	5	2	2	3	7	4	5	7	4	4	3	3	6	1	5	4	3	6	5	3	7	3	3	7	2	6	9	3	10	1	5	6	4	6	4
fig|6666666.374191.peg.120	5	1	1	1	1	2	1	7	2	5	3	4	6	6	6	4	7	9	6	5	7	5	4	2	4	3	6	2	7	7	3	4	8	3	5	2	2	7	3	6	9	8	8	1	4	3	7	8	7
fig|6666666.374191.peg.36	4	1	1	1	1	2	0	5	2	4	5	4	4	4	8	3	7	8	3	6	4	2	6	3	3	2	7	2	5	5	3	5	5	6	8	2	2	5	1	3	5	5	7	1	5	2	5	5	4
fig|6666666.374191.peg.103	6	0	1	1	2	2	1	5	2	9	6	3	8	6	6	3	6	8	5	4	6	6	4	5	4	3	9	2	8	6	5	6	6	2	7	2	3	3	2	5	7	4	9	1	3	3	4	11	5
fig|6666666.374191.peg.17	4	0	0	0	1	1	1	2	1	3	4	4	7	3	6	5	4	4	4	5	4	3	4	3	3	1	6	2	4	4	8	6	4	4	8	2	2	4	2	7	3	4	5	1	5	3	6	6	7
fig|6666666.374191.peg.135	3	0	1	1	1	2	1	5	2	6	1	5	9	5	4	4	5	5	4	7	4	5	6	3	3	2	5	1	6	4	3	4	5	4	8	2	2	3	3	9	7	7	6	1	6	3	2	11	7
fig|6666666.374191.peg.104	3	1	2	2	2	4	3	6	5	8	9	7	6	6	5	6	5	9	6	9	5	5	6	6	7	6	8	5	3	6	6	4	5	7	6	5	6	3	5	4	6	3	4	2	7	6	6	4	5
fig|6666666.374191.peg.102	3	1	1	1	2	2	2	4	2	5	5	4	7	7	8	5	8	7	8	7	4	3	6	4	3	3	8	2	6	5	7	8	9	4	6	3	2	5	2	6	7	10	6	2	6	4	4	7	8
fig|6666666.374191.peg.156	8	1	1	2	1	3	2	6	3	8	6	6	4	5	8	6	7	6	5	3	7	6	4	4	3	3	9	2	9	8	5	9	6	3	6	2	2	5	3	6	5	7	8	1	6	3	8	8	11
fig|6666666.374191.peg.9	4	1	1	2	2	4	4	3	3	5	6	5	4	5	4	7	4	7	4	4	8	5	6	5	4	6	6	4	4	5	5	4	5	4	3	5	3	4	5	7	7	4	5	2	6	6	4	4	6
fig|6666666.374191.peg.119	7	1	2	2	2	3	3	8	2	8	5	6	6	6	9	7	7	8	7	6	8	8	8	4	3	5	6	3	6	7	4	5	4	3	9	2	4	5	5	11	5	7	5	2	5	4	5	4	10
fig|6666666.374191.peg.82	7	1	1	1	2	3	2	10	3	8	6	6	6	7	5	6	7	8	7	6	6	8	7	3	5	4	5	4	5	8	6	4	6	4	8	2	3	5	4	13	5	6	2	2	9	3	4	4	6
fig|6666666.374191.peg.84	6	1	2	1	2	3	3	6	3	7	6	6	9	11	8	7	6	9	4	5	8	6	6	4	3	4	6	4	6	7	7	7	7	5	6	3	4	4	4	8	5	6	6	2	7	4	7	6	5
fig|6666666.374191.peg.106	6	0	0	1	1	2	1	5	2	6	2	3	3	4	5	5	3	7	6	4	2	3	3	2	1	2	4	1	6	5	3	8	6	2	8	1	2	2	2	6	5	4	5	1	7	2	4	6	5
fig|6666666.374191.peg.39	3	1	2	3	3	5	4	3	5	5	6	9	4	6	2	4	7	8	7	5	7	7	6	6	6	7	4	4	5	6	6	3	7	5	4	3	4	4	7	4	4	5	3	2	6	7	5	4	6
fig|6666666.374191.peg.16	3	1	2	2	2	5	3	5	5	6	5	6	5	5	4	8	5	5	8	5	6	4	5	6	6	7	5	3	6	9	8	3	8	5	3	4	4	3	6	3	6	5	2	3	5	5	7	4	5
fig|6666666.374191.peg.75	3	1	1	1	2	4	2	7	3	10	5	7	6	6	6	5	6	7	8	6	7	6	6	4	4	2	5	3	7	6	6	4	5	8	6	3	3	5	3	8	4	7	5	1	7	5	6	2	6
fig|6666666.374191.peg.157	2	2	3	3	4	4	4	2	4	3	5	4	1	3	2	3	3	3	3	2	2	3	3	6	5	5	4	5	4	4	2	2	2	4	2	6	5	1	5	2	2	3	2	5	3	5	4	2	3
fig|6666666.374191.peg.74	3	2	3	3	3	7	3	5	5	2	5	4	4	4	4	4	4	4	3	3	3	4	4	6	5	5	6	7	4	4	5	2	4	5	3	6	6	2	5	4	2	2	2	4	3	6	4	2	2
fig|6666666.374191.peg.85	5	1	1	2	2	4	2	7	3	8	6	6	5	7	6	7	8	8	5	8	6	8	8	5	3	4	8	2	5	6	4	6	9	7	6	3	6	6	6	10	7	7	6	2	10	7	6	6	5
fig|6666666.374191.peg.81	4	1	2	2	3	4	1	9	3	13	5	6	6	5	7	3	8	7	6	7	8	5	9	5	6	5	6	3	8	6	7	6	7	6	4	3	3	4	5	6	6	6	6	2	9	5	7	5	5
fig|6666666.374191.peg.68	3	2	3	3	2	5	4	4	5	3	5	6	6	7	4	6	5	6	3	4	4	4	7	7	4	5	5	5	6	6	5	5	4	6	5	7	5	4	6	5	2	4	3	4	3	7	4	3	4
fig|6666666.374191.peg.165	4	1	3	2	4	4	4	8	4	5	8	8	6	9	3	7	6	8	7	7	6	6	8	5	5	6	6	4	5	7	7	5	6	6	4	3	6	3	8	6	6	5	5	2	7	9	7	6	5
fig|6666666.374191.peg.13	5	1	2	2	3	5	3	4	4	5	5	5	3	5	3	4	6	2	7	3	5	4	6	7	6	6	5	4	6	5	6	1	4	8	2	4	4	3	7	6	4	3	3	3	4	5	6	3	6
fig|6666666.374191.peg.29	4	2	2	2	4	5	2	7	4	8	7	5	7	5	4	6	7	6	8	7	7	7	7	5	8	5	8	5	9	5	6	4	7	7	4	5	4	5	6	8	4	7	5	3	7	6	4	4	6
fig|6666666.374191.peg.116	6	1	1	2	2	4	2	6	4	6	8	8	7	6	8	7	8	9	8	7	7	7	8	5	3	4	8	4	7	6	6	5	7	9	7	3	3	4	5	7	7	6	5	3	5	6	8	5	5
fig|6666666.374191.peg.93	4	1	2	2	4	6	3	3	3	5	6	8	4	5	4	6	5	4	4	7	5	5	7	5	6	7	4	5	5	7	6	3	5	5	4	5	6	2	7	4	2	2	3	4	4	4	5	3	5
fig|6666666.374191.peg.65	6	1	2	1	2	4	3	6	3	8	8	7	7	8	8	7	4	9	7	3	3	4	6	3	5	4	8	3	10	7	7	7	6	4	4	5	4	6	4	8	7	8	5	2	7	4	5	7	5
fig|6666666.374191.peg.95	7	1	2	2	2	5	3	4	5	6	6	6	7	5	5	5	7	5	7	5	6	6	10	7	6	7	7	6	6	7	5	3	5	6	5	4	4	3	4	5	5	4	4	3	4	3	7	5	5
fig|6666666.374191.peg.57	4	1	1	2	2	2	3	4	3	6	8	5	5	5	5	9	6	6	8	8	6	5	7	3	7	4	8	3	10	8	6	5	6	4	5	3	5	5	4	6	5	6	3	2	8	7	6	8	9
fig|6666666.374191.peg.55	5	1	2	1	3	5	3	3	5	5	5	8	7	8	6	5	5	6	7	4	9	4	8	7	6	3	5	3	4	7	6	2	7	5	4	3	4	3	6	6	7	6	5	2	7	6	5	7	6
fig|6666666.374191.peg.166	5	1	1	1	2	4	3	6	3	6	5	7	6	9	7	8	7	8	10	8	7	4	7	6	7	4	9	3	11	9	5	5	4	4	6	3	2	5	5	5	5	12	6	2	5	6	6	5	6
fig|6666666.374191.peg.139	5	1	1	2	2	3	2	8	2	5	5	4	4	3	10	4	7	7	6	8	4	6	4	3	3	3	7	2	7	4	3	4	6	4	7	3	3	4	4	11	6	5	6	1	5	4	7	2	3
fig|6666666.374191.peg.112	1	1	1	1	1	1	1	5	2	9	2	3	6	4	7	3	5	4	4	5	4	4	3	2	3	0	8	1	3	2	4	2	5	3	7	2	2	1	2	3	4	5	6	1	4	2	6	11	7
fig|6666666.374191.peg.35	3	2	2	3	4	5	4	6	6	6	4	6	5	5	3	4	5	5	4	4	3	6	3	7	5	8	5	6	4	6	4	4	6	4	3	5	5	2	7	5	3	3	3	4	3	6	3	3	4
fig|6666666.374191.peg.99	4	1	2	1	2	2	2	5	2	4	5	5	3	9	6	4	2	6	5	4	6	6	4	3	6	4	7	3	4	4	6	3	7	2	6	2	3	5	3	3	7	8	5	2	7	3	6	9	5
fig|6666666.374191.peg.128	9	1	1	1	2	2	2	5	1	8	4	4	7	9	8	6	5	10	8	7	6	5	7	4	8	4	8	3	9	6	7	5	7	3	5	3	3	6	5	11	6	5	10	2	5	4	5	8	7
fig|6666666.374191.peg.122	5	1	1	1	2	3	2	7	3	8	6	4	8	8	9	7	8	11	7	6	5	6	9	5	7	3	8	3	8	5	8	5	9	4	8	3	3	4	5	13	7	7	10	2	6	4	5	7	7
fig|6666666.374191.peg.159	2	1	1	1	3	3	3	6	3	12	4	6	7	5	7	6	4	5	7	5	6	6	4	5	3	5	6	2	6	5	5	10	4	2	5	2	2	3	2	7	5	5	6	2	8	4	5	3	8
fig|6666666.374191.peg.162	4	1	2	2	3	6	3	4	4	3	8	5	4	7	5	6	3	7	6	5	6	6	4	5	5	3	5	5	8	7	7	4	3	5	5	3	3	3	4	3	3	4	2	2	4	5	4	3	4
fig|6666666.374191.peg.121	3	1	1	1	0	1	1	3	3	3	2	3	2	5	3	7	3	8	3	6	3	4	4	2	2	1	5	2	6	6	4	2	4	3	2	1	2	2	2	6	6	8	8	0	3	3	5	7	5
fig|6666666.374191.peg.54	5	1	2	1	2	3	2	8	2	7	5	5	7	8	3	8	8	9	10	5	5	9	5	5	6	4	7	3	8	7	6	5	6	4	5	2	3	5	4	9	9	10	8	2	9	4	8	9	8
fig|6666666.374191.peg.155	3	0	1	1	1	2	1	7	3	9	3	5	6	5	6	7	5	6	7	5	4	4	3	2	1	2	6	2	6	6	3	3	2	5	5	1	2	4	4	4	5	8	4	1	6	3	5	4	7
fig|6666666.374191.peg.105	2	0	1	1	0	1	1	1	1	3	1	2	7	2	9	3	5	3	2	3	5	2	5	1	3	2	6	2	3	4	3	8	4	1	5	1	1	1	2	7	3	3	5	1	3	3	3	8	5
fig|6666666.374191.peg.160	5	1	1	1	1	2	1	10	3	4	2	2	6	5	4	2	6	8	6	2	4	5	4	2	3	2	7	3	5	3	5	7	7	4	8	1	1	8	3	6	12	7	13	1	5	4	3	11	7
fig|6666666.374191.peg.48	4	1	1	1	2	4	2	7	2	10	6	6	7	4	8	5	6	10	7	5	5	5	5	3	5	3	5	3	6	7	7	6	5	4	10	3	3	5	2	5	6	6	7	2	6	5	6	5	6
fig|6666666.374191.peg.117	4	1	1	0	1	2	1	5	1	11	2	3	4	4	6	4	3	6	4	3	3	6	5	3	3	2	3	2	6	5	3	4	4	5	7	1	2	5	4	6	8	4	8	1	5	2	4	7	7
fig|6666666.374191.peg.171	7	1	2	1	2	6	3	4	4	7	8	7	7	7	8	7	9	5	4	8	8	10	5	7	6	5	5	3	6	8	6	4	7	6	6	5	4	2	4	5	4	4	3	2	6	6	7	6	7
fig|6666666.374191.peg.15	7	1	2	2	3	5	3	6	2	10	4	8	4	6	9	8	9	6	5	6	7	7	6	5	4	4	8	5	7	7	8	5	5	6	4	4	5	3	6	6	5	8	6	3	7	5	5	5	6
fig|6666666.374191.peg.83	4	1	2	1	4	6	3	5	4	6	6	5	3	5	6	5	7	4	8	5	7	5	5	5	7	6	6	4	8	9	6	4	7	4	5	4	4	4	5	7	2	6	6	2	6	5	6	5	9
fig|6666666.374191.peg.86	4	1	2	2	3	4	4	5	4	10	7	10	5	4	6	8	8	9	6	7	6	9	5	5	6	4	7	4	6	7	5	4	7	4	5	5	3	3	4	7	4	6	4	3	3	4	6	4	6
fig|6666666.374191.peg.73	5	1	2	1	4	5	4	5	5	5	5	7	4	4	4	5	5	7	6	6	6	5	6	5	8	5	6	5	6	7	6	4	5	5	3	5	3	2	4	4	3	2	3	3	6	5	6	5	5
fig|6666666.374191.peg.51	4	1	2	2	3	5	3	5	3	5	8	7	4	6	6	5	8	5	5	5	6	7	7	6	8	7	5	5	5	7	7	4	6	5	4	4	5	3	6	6	4	4	4	3	6	7	4	3	4
fig|6666666.374191.peg.14	4	1	2	1	2	4	3	5	4	6	5	8	5	5	4	6	7	5	7	4	7	4	5	6	5	6	4	7	9	5	9	4	7	5	3	5	4	5	3	5	3	3	2	1	4	4	5	4	7
fig|6666666.374191.peg.70	6	1	2	1	2	6	2	6	4	8	8	7	7	6	6	8	6	6	6	7	6	5	6	4	3	5	4	5	8	10	8	4	8	6	5	5	4	3	5	7	5	8	3	2	7	3	8	5	3
fig|6666666.374191.peg.140	7	1	1	1	1	3	1	4	2	5	1	4	4	7	6	4	5	6	6	2	4	2	3	2	3	2	3	2	6	4	4	8	2	3	3	1	2	1	3	5	4	3	3	2	2	3	4	3	3
fig|6666666.374191.peg.38	3	1	2	2	4	5	4	3	4	3	4	6	4	6	3	5	5	4	4	5	5	3	7	5	4	4	4	6	6	7	7	4	3	6	4	5	4	3	6	5	4	3	2	3	6	5	5	4	3
fig|6666666.374191.peg.52	4	1	3	2	4	5	5	4	4	2	5	3	3	5	4	4	5	4	5	3	6	6	6	7	8	8	5	7	6	6	7	3	6	4	3	4	6	3	7	4	2	4	3	3	4	4	4	3	5
fig|6666666.374191.peg.1	4	1	3	2	3	5	3	5	3	8	6	7	3	5	5	5	4	5	5	5	5	7	8	6	8	5	5	5	6	6	8	5	7	4	3	3	4	2	5	5	3	6	5	3	5	8	6	5	4
fig|6666666.374191.peg.42	3	1	2	2	3	5	4	5	5	4	5	6	4	5	5	6	8	6	4	4	5	5	8	8	6	5	6	5	5	7	6	3	5	8	3	5	5	3	4	4	4	3	3	3	6	5	5	3	4
fig|6666666.374191.peg.158	3	1	1	1	1	3	2	6	3	11	5	8	8	5	10	6	6	9	8	7	5	5	9	2	3	2	10	2	4	5	4	3	8	7	13	3	3	4	4	9	4	9	5	2	8	3	3	8	6
fig|6666666.374191.peg.154	5	1	1	1	1	3	1	7	2	6	4	5	7	7	5	6	8	5	7	7	7	6	7	4	5	4	7	2	7	6	5	12	9	2	8	3	3	2	4	6	4	7	7	2	6	3	8	7	8
fig|6666666.374191.peg.148	5	1	1	1	2	2	2	4	2	10	5	4	4	5	6	8	3	4	5	3	6	4	4	2	3	3	10	2	5	4	4	1	4	5	11	2	3	9	3	9	7	8	8	2	5	4	6	8	6
fig|6666666.374191.peg.10	5	1	1	2	1	2	2	4	3	5	5	3	5	6	3	7	4	5	6	3	6	6	4	4	3	2	10	3	4	4	4	4	3	3	6	1	2	5	2	3	7	7	8	1	5	3	6	4	6
fig|6666666.374191.peg.69	3	1	2	2	2	4	3	7	4	10	6	6	5	6	6	9	8	5	6	3	3	8	6	4	4	5	9	4	10	8	8	8	5	5	5	1	2	6	4	8	6	6	6	2	11	5	9	6	10
fig|6666666.374191.peg.144	6	1	1	1	1	1	1	5	2	10	4	5	9	4	3	6	8	3	6	7	4	3	5	4	4	2	7	1	5	3	4	7	6	3	7	3	2	4	2	9	3	6	8	1	4	3	4	8	6
fig|6666666.374191.peg.60	7	0	0	1	2	2	2	7	2	6	5	4	10	4	4	3	3	5	6	3	3	5	4	3	2	2	4	2	6	6	5	5	4	4	6	2	3	6	3	8	5	6	8	1	9	3	5	6	7
fig|6666666.374191.peg.114	6	0	1	1	1	3	2	12	3	9	3	3	6	6	7	8	8	9	7	5	7	7	5	5	4	3	11	3	7	7	5	3	9	4	8	2	2	8	4	4	5	4	4	1	6	3	4	5	7
fig|6666666.374191.peg.110	4	1	2	1	3	4	3	4	2	5	4	3	8	4	6	7	7	5	6	6	7	3	6	5	8	5	5	4	7	7	6	6	2	3	6	4	3	7	5	8	8	7	8	1	9	4	6	9	8
fig|6666666.374191.peg.64	8	1	1	1	2	3	2	5	4	8	7	6	8	6	5	6	7	6	5	8	12	8	8	6	6	6	7	3	9	8	6	9	8	7	6	4	4	4	4	10	4	9	6	2	8	5	6	6	10
fig|6666666.374191.peg.97	5	1	1	1	2	3	3	6	3	10	5	6	7	8	8	11	6	7	6	4	7	7	7	4	4	3	8	3	10	9	6	7	8	5	7	4	2	6	3	10	5	7	7	2	8	5	3	8	5
fig|6666666.374191.peg.164	5	1	2	1	2	2	2	4	2	6	6	4	6	6	7	4	6	6	4	5	5	5	6	4	3	4	5	4	5	4	5	3	7	6	4	4	4	6	4	9	4	5	6	2	5	6	6	2	3
fig|6666666.374191.peg.127	5	1	1	1	2	3	3	5	2	10	6	4	7	5	8	8	5	5	7	6	9	5	5	3	7	4	5	2	9	5	5	6	9	5	6	3	4	5	5	9	8	8	11	2	8	4	3	7	7
fig|6666666.374191.peg.146	8	1	1	1	2	4	2	7	2	10	3	5	6	9	6	5	6	8	11	6	6	9	6	4	6	5	14	3	8	7	5	6	7	5	5	3	3	6	4	5	5	10	6	2	6	6	6	6	8
fig|6666666.374191.peg.142	6	1	1	1	1	3	3	5	2	4	3	4	7	5	4	6	6	6	4	5	2	5	4	4	4	3	12	2	6	6	4	2	6	7	7	1	2	6	4	5	6	5	5	1	3	3	3	5	8
fig|6666666.374191.peg.37	5	1	2	2	3	4	4	6	4	11	5	7	9	8	6	8	7	6	6	8	9	6	6	5	4	5	9	4	8	7	5	9	6	7	7	4	5	5	4	4	5	7	4	2	7	5	6	6	6
fig|6666666.374191.peg.143	5	1	1	1	1	3	1	5	2	11	4	4	8	4	7	7	8	12	6	9	7	6	7	4	3	3	7	3	8	7	5	7	9	7	6	3	3	3	3	7	6	10	6	2	8	3	5	7	8
fig|6666666.374191.peg.28	4	1	1	1	2	3	2	4	3	9	4	5	5	6	11	6	8	6	9	4	6	6	5	3	4	4	7	4	6	7	7	5	7	4	7	4	3	3	4	7	7	4	4	2	7	4	4	4	8
fig|6666666.374191.peg.26	6	1	1	1	1	3	2	4	2	8	4	6	5	6	8	6	5	9	6	6	6	6	7	4	4	4	10	3	6	5	5	8	8	8	6	2	3	6	3	7	10	8	7	2	4	4	10	7	10
fig|6666666.374191.peg.19	5	1	1	2	2	4	2	7	4	8	7	9	7	8	8	9	4	10	8	7	7	7	7	5	2	6	8	4	9	4	6	6	9	6	5	3	2	3	3	6	3	9	6	2	9	5	8	4	8
fig|6666666.374191.peg.63	8	1	2	1	1	3	2	7	2	11	5	5	9	6	8	8	5	8	6	8	5	5	6	5	5	2	7	4	5	7	5	8	9	5	6	4	2	2	2	9	8	9	7	1	10	5	7	7	8
fig|6666666.374191.peg.2	3	0	1	1	2	3	2	5	3	7	5	5	4	8	8	5	7	8	8	4	3	6	5	4	6	3	10	2	10	7	4	4	7	8	9	3	2	5	2	5	5	8	9	1	5	3	5	5	8
fig|6666666.374191.peg.141	5	1	1	1	1	2	2	3	2	4	3	3	5	4	4	3	3	5	5	3	6	2	3	3	2	2	9	2	6	5	3	7	3	5	4	1	2	3	1	3	6	4	5	1	3	3	3	6	5
fig|6666666.374191.peg.62	2	0	1	1	1	1	1	4	2	5	2	2	6	5	8	4	5	3	3	3	3	4	5	2	3	2	7	2	5	5	3	7	8	5	7	2	2	6	2	5	2	7	6	1	5	3	6	4	7
fig|6666666.374191.peg.90	3	0	1	1	2	1	2	4	2	5	4	4	4	4	5	5	3	6	4	5	4	4	4	2	3	3	3	2	7	4	3	6	6	3	6	1	2	2	1	3	4	3	5	1	6	1	3	6	3
fig|6666666.374191.peg.131	7	1	1	1	1	3	1	9	2	8	5	4	9	3	7	7	10	7	8	8	9	4	5	5	3	4	6	3	5	7	9	11	10	4	7	2	4	7	3	11	7	9	9	2	8	2	7	7	13
fig|6666666.374191.peg.137	3	1	1	1	1	2	3	7	3	14	6	4	8	7	6	5	7	11	6	7	5	6	6	3	4	3	12	1	9	7	5	6	5	6	9	4	4	7	3	7	8	7	6	1	9	4	6	10	6
fig|6666666.374191.peg.108	5	1	1	1	2	4	2	4	2	6	3	4	6	6	5	7	8	6	7	3	7	6	4	4	4	4	6	2	6	6	7	5	5	5	5	4	3	5	3	6	5	8	5	1	6	4	8	4	10
fig|6666666.374191.peg.58	5	1	1	1	3	3	3	4	2	6	4	3	7	5	5	4	8	7	9	5	3	3	7	5	6	4	9	3	6	5	6	4	5	6	10	1	3	10	4	6	4	7	10	2	7	4	6	4	11
fig|6666666.374191.peg.136	5	0	1	1	1	2	1	6	1	4	2	3	3	3	8	3	6	9	6	6	4	4	6	3	2	2	6	2	6	5	5	8	8	5	6	2	2	2	3	5	6	4	5	1	8	4	6	5	9
fig|6666666.374191.peg.111	10	1	1	1	1	2	1	6	3	7	4	4	5	5	4	5	5	8	9	8	6	6	5	3	3	2	8	2	8	6	5	6	4	6	8	2	4	7	3	10	8	11	9	2	7	5	5	9	8
fig|6666666.374191.peg.7	7	1	1	1	1	1	1	7	1	6	3	2	5	4	5	4	5	6	5	5	3	3	4	2	3	1	7	1	3	3	2	4	5	3	11	1	2	1	2	6	7	8	8	1	4	1	4	3	6
[truncated: 123 more columns]
